# Trellis Single-Cell Screening Reveals Stromal Regulation of Patient-Derived Organoid Drug Responses

María Ramos Zapatero<sup>1,5</sup>, Alexander Tong<sup>2,3,5</sup>, Jahangir Sufi<sup>1</sup>, Petra Vlckova<sup>1</sup>, Ferran Cardoso Rodriguez<sup>1</sup>, Callum Nattress<sup>1</sup>, Xiao Qin<sup>1</sup>, Daniel Hochhauser<sup>4</sup>, Smita Krishnaswamy<sup>2\*</sup>, Christopher J. Tape<sup>1\*</sup>

<sup>1</sup>Cell Communication Lab, Department of Oncology, University College London Cancer Institute, London, UK.

<sup>2</sup>Department of Computer Science, Yale University, New Haven, CT, USA.

<sup>3</sup>Department of Computer Science and Operations Research, Université de Montréal, Mila—The Quebec AI Institute, Montreal, Canada.

<sup>4</sup>Drug-DNA Interactions Group, Department of Oncology, University College London Cancer Institute, London, UK.

<sup>5</sup>These authors contributed equally.

\*Correspondence: c.tape@ucl.ac.uk, smita.krishnaswamy@yale.edu

## Abstract

**Patient-derived organoids (PDOs) can model personalized therapy responses, however current screening technologies cannot reveal drug response mechanisms or study how tumor microenvironment cells alter therapeutic performance. To address this, we developed a highly-multiplexed mass cytometry platform to measure post translational modification (PTM) signaling in >2,500 colorectal cancer (CRC) PDOs and cancer-associated fibroblasts (CAFs) in response to clinical therapies at single-cell resolution. To compare patient- and microenvironment-specific drug responses in thousands of single-cell datasets, we developed *Trellis* — a highly-scalable, hierarchical tree-based treatment effect analysis method. *Trellis* single-cell screening revealed that on-target cell-cycle blockage and DNA-damage drug effects are common, even in chemorefractory PDOs. However, drug-induced apoptosis is patient-specific. We found drug-induced apoptosis does not correlate with genotype or clinical staging but does align with cell-intrinsic PTM signaling in PDOs. CAFs protect chemosensitive PDOs by shifting cancer cells into a slow-cycling cell-state and CAF chemoprotection can be reversed by inhibiting YAP.**

## Highlights

- >2,500 single-cell PTM signaling, DNA-damage, cell-cycle, and apoptosis responses from drug-treated PDOs and CAFs.
- *Trellis*: hierarchical tree-based treatment effect method for single-cell screening analysis.
- PDOs have patient-specific drug responses that align with cell-intrinsic PTM signaling states.
- CAFs chemoprotect PDOs by altering PDO cell-state via YAP signaling.

## 37 1 Introduction

38 Tumors are heterogeneous cellular systems comprising cancer cells, stromal fibroblasts, and various  
39 immune cells. Tumor phenotypes are regulated by cell-intrinsic mutations within cancer cells and cell-  
40 extrinsic cues from the tumor microenvironment (TME) [1]. Colorectal cancer (CRC) kills >0.9 million  
41 people per year worldwide [2] and is characterized by a high inter-patient genetic heterogeneity and patient-  
42 specific responses to therapy [3]. Cancer associated fibroblasts (CAFs) are one of the most abundant cell-  
43 types in the CRC TME [4]. CAF abundance correlates with poor overall survival [5], and influences response  
44 to both targeted therapies [6] and radiotherapy [7]. However, there is a lack of understanding regarding how  
45 CAFs regulate cancer cell response to therapy and to what extent stromal regulation is patient-specific.

46 Patient-derived organoids (PDOs) are personalized cancer models [8] that can mimic their parent tumors’  
47 response to chemotherapies [9] — with several studies proposing PDOs as personalized avatars of drug  
48 response [10]. However, epithelial PDO monocultures cannot model the influence of stromal cells on therapy  
49 response. PDOs can be co-cultured with stromal and immune cells to recapitulate elements of the TME  
50 [11], but how this alters PDO phenotypes and personalized drug response is unknown. Moreover, PDO drug  
51 sensitivity is typically measured using bulk live/dead viability assays [12] that cannot resolve cell-type-  
52 specific data from co-cultures and provide no mechanistic insight into drug responses [13].

53 To overcome these limitations, we developed a highly-multiplexed Thiol-reactive Organoid Barcoding  
54 *in situ* (TOBis) mass cytometry [14, 15] platform to study how anti-cancer therapies regulate the cell-state,  
55 DNA-damage response, and post-translational modification (PTM) signaling of CRC PDOs in the presence  
56 or absence of CAFs at single-cell resolution across >2,500 PDO-CAF cultures. To compare single-cell  
57 drug responses from thousands of cell-type-specific datasets, we developed *Trellis*, a hierarchical tree-based  
58 treatment effect analysis method that derives generalized optimal transport distances between samples after  
59 normalizing by their own controls. TOBis mass cytometry and *Trellis* revealed drug-induced PTM signaling  
60 responses are PDO-specific and demonstrated CAFs protect CRC cells from chemotherapy by shifting ep-  
61 ithelial cells into a slow-cycling cell-state. CAF chemoprotection could be rationally reversed by inhibiting  
62 YAP-signaling using insights from single-cell PTM data, demonstrating the utility of PTM-focused drug  
63 screening for overcoming therapy resistance. These results illustrate the functional intertumoral heterogene-  
64 ity of patient-specific drug response mechanisms and suggest TME cells should be included in future PDO  
65 models.

## 66 2 Results

### 67 Patient- and Microenvironment-Specific Single-Cell PTM PDO-CAF Drug Analysis

68 To study how CAFs regulate patient-specific drug response signaling, we established a high-throughput  
69 3D organoid co-culture system comprising 10 CRC PDOs [12] (Table S1) cultured either alone or with CRC  
70 CAFs [16, 17]. Organoid cultures were treated in triplicate with either vehicle control, or titrated combi-  
71 nations of clinical therapies fluoropyrimidine 5-fluorouracil (5-FU), SN-38 (active metabolite of Irinote-  
72 can), Oxaliplatin, and Cetuximab (EGFR inhibitor). The pre-clinical therapy LGK974 (PORCN inhibitor)  
73 [12] was also studied to investigate PDO-CAF WNT signaling and Berzosertib (VX-970) was included as  
74 ATR inhibition has been hypothesized to synergize with DNA-damaging agents in CRC [18] (Figure 1a)  
75 (Table S2). Following treatment, each culture was fixed, stained with thiol-reactive monoisotopic TOBis  
76 barcodes [15], pooled, dissociated into single-cells, stained with a panel of 44 rare-earth metal antibodies  
77 (spanning cell-type, cell-state, DNA-damage, and PTM signaling markers (Table S3)), and analyzed by mass  
78 cytometry (Figure 1b). Following multiplexed debarcoding [19] and cell-type-specific gating, we obtained

79 >10 million PDO cells and >15 million CAFs from 2,520 3D cultures (3,360 cell-type-specific single-cell  
80 PTM signaling datasets).

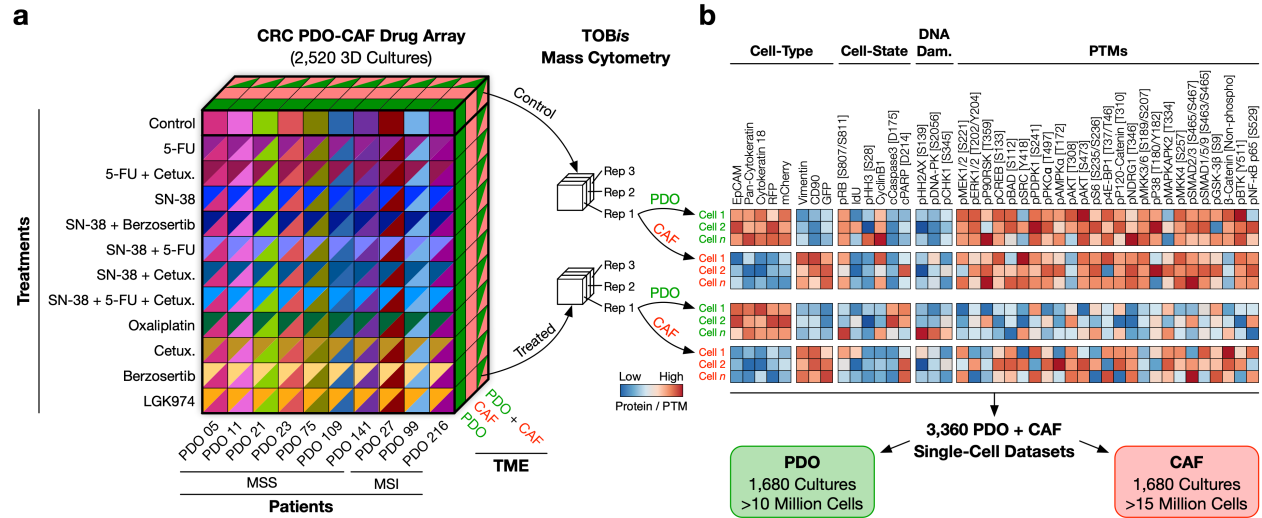

**Figure 1: TOBis MC Single-Cell PTM PDO-CAF Drug Responses.** **a**) Multidimensional array of 10 CRC PDO (7 microsatellite stable (MSS), 3 microsatellite instable (MSI)) treated with 11 titrated drug combinations either alone or in co-culture with CRC CAFs in triplicate (2,520 3D cultures). **b**) PDO-CAFs were barcoded *in situ* using TOBis, stained with 44 rare-earth metal antibodies spanning cell-type identification, cell-state, DNA-damage response, and PTM signaling, and analyzed by MC (3,360 single-cell PTM datasets).

## 81 **Trellis: Hierarchical Tree-Based Single-Cell Treatment Effect Analysis**

82 Highly-multiplexed single-cell cytometry screening data presents several analytical challenges. First,  
83 existing work on large single-cell data uses the manifold structure of transcriptomic technologies, where cell  
84 distances are locally Euclidean [20–24]. However, in cytometry data antibody panels are designed based on  
85 prior biological knowledge, and analyzed using gating strategies that follow a hierarchical structure, which  
86 are better described by tree distances rather than a single smooth manifold. Second, our PDO-CAF PTM  
87 screening data contains >2,500 conditions with >25 million cells. Existing state of the art to analyze such  
88 large datasets is to compare cluster proportions between single-cell samples [25–27]. Emerging methods can  
89 compare distributions using earth mover’s distance (EMD), but only at course granularity [22], or by using  
90 graph diffusion which does not account for the hierarchical tree structure of cytometry data [23]. As highly-  
91 multiplexed single-cell screening datasets are becoming increasingly common, there is a need for tools  
92 that can efficiently compare thousands of single-cell conditions. Finally, large screening datasets compare  
93 independent systems (e.g. patients, microenvironments, and/or technical batches) perturbed by constant  
94 treatments. For this, internal controls need to be leveraged, such that multiple controls and treatments can  
95 be directly compared in a common computational space. To solve these problems, we developed *Trellis*.

96 Comparisons between single-cell datasets typically treat all markers equally — irrespective of prior  
97 biological knowledge. While equal weighting may be appropriate for unbiased single-cell methods such as  
98 scRNA-Seq, *Trellis* leverages the experimental design of cytometry data using a ‘branch’ tree hierarchy of  
99 well-defined biological processes (e.g. cell-type hierarchies or cell-states) that supervenes upon randomized

100 ‘leaves’ of latent biological significance (via four levels of four  $k$ -means clusters) (Figure 2a). This enables  
101 an automated assessment of cell populations that mimics human intuition in the design of the experiment,  
102 and subsequently its interpretation (Figure S1). Trellis can leverage any gating strategy that returns a single  
103 hierarchy or multiple hierarchies (Algorithm 1 line 3).

---

**Algorithm 1:** High-level Trellis algorithm for comparing single-cell treatment effects

---

- 1: **Input:** Dataset containing controls and variables
  - 2: **Output:** Distances between treatment effects to their relative controls
  - 3: Build tree or trees incorporating prior knowledge on markers followed by random construction with edge weights  $w$  for each node.
  - 4: Embed each distribution to a vector with each element as fraction of dataset in that node forming abundance matrix  $\mathbf{A}$ .
  - 5: Multiply element-wise  $w \otimes \mathbf{A}$  to calculate Trellis embeddings  $\mathbf{E}$ .
  - 6: (optionally) Subtract relevant control vectors for paired Trellis embeddings  $\tilde{\mathbf{E}}$ .
  - 7: **return** Relevant  $L^1$  distances between embeddings.
- 

104 Once one or multiple hierarchies are defined, Trellis then embeds each single-cell distribution into a  
105 vector such that for two distributions, the  $L^1$  distance between embeddings is equivalent to the EMD between  
106 the two distributions along the defined tree or forest (Algorithm 1 lines 4-5). By reducing a complicated and  
107 inefficient distance calculation to a vector distance, Trellis can scale to larger datasets by leveraging existing  
108 work in high-dimensional distance computation (Figure S2). For instance, if we only need to find the nearest  
109 neighbor treatments for non-linear embedding [21, 28], we leverage fast nearest neighbor algorithms such  
110 as KD-trees as used in PHATE [21], Annoy [29] used in UMAP [30] and Scanpy [31], or locally sensitive  
111 hashing [32, 33].

112 As single-cell screens increase in size and complexity, the use of internal controls enables the compar-  
113 ison of independent variables in parallel. Existing distribution comparison methods cannot easily incorpo-  
114 rate pairing of controls to variables, indeed EMD is not even defined for the difference of distributions. To  
115 solve this, Trellis can easily be extended to ‘paired’ Trellis (Algorithm 1 line 6), where paired controls are  
116 subtracted from treatment samples to directly compare treatment effects. We prove this is equivalent to a  
117 Kantorovich-Rubenstein (KR) norm with tree ground distance (Prop. 2). This KR norm cannot be com-  
118 puted with standard Wasserstein distance methods (even for small problems [34, 35]) but can be calculated  
119 by Trellis. Paired Trellis therefore enables thousands of variables to be compared to their internal controls  
120 in a common computational space — enabling clear distinction of individual treatment effects in paralleled  
121 high-dimensional single-cell screening data (Figure S1a).

122 In summary, Trellis uses a prior-driven tree domain to compute the generalized Wasserstein distance  
123 between thousands of single-cell samples. Pairing treatments to controls enables paralleled visualization of  
124 treatment effects (Figure S1a) and reduces batch effects in serially acquired screening data (Figure S1b).  
125 Prior-driven branches further resolve biologically important treatment effects (Figure S1c). Trellis out-  
126 performs existing single-cell treatment effect methods (Figure S2a) and the tree domain structure enables  
127 thousands of single-cell datasets to be analyzed rapidly (Figure S2b). Prior-driven branches are customiz-  
128 able to different biological questions and Trellis recapitulates features of published datasets (Figure S3).  
129 Further detail on Trellis’ scalability, theoretical soundness, and robustness can be found in Methods.

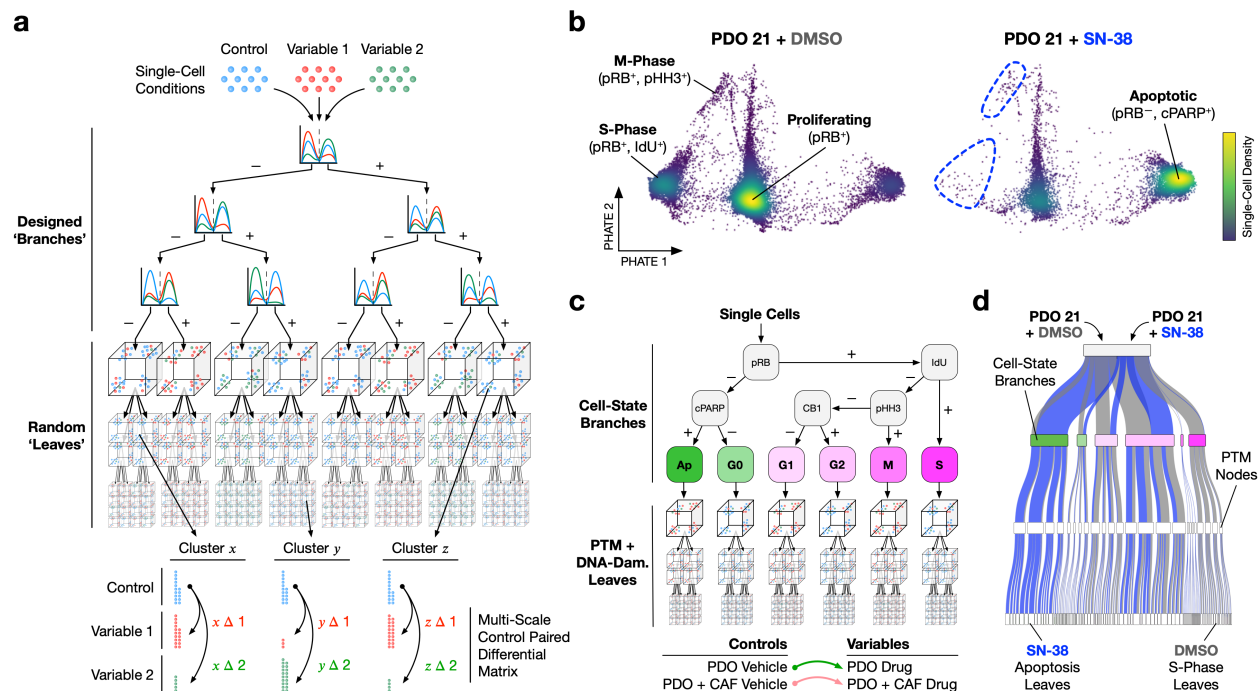

**Figure 2: Trellis Single-Cell Treatment Effect Analysis.** **a**) Single cells from control and variable conditions are distributed through a tree comprising designed 'branches' that supervene upon randomized  $k$ -means clustering nodes, ending in 'leaves'. Branches weigh hierarchical gating strategies while nodes and leaves leverage latent parameters. In each node of the tree, variables are subtracted from paired controls to create a multi-scaled differential matrix (representing a Kantorovich-Rubinstein norm) that scales to thousands of conditions. **b**) Single-cell density PHATEs of PDO 21 treated with DMSO or SN-38 (irinotecan). SN-38 results in cell-cycle exit (IdU<sup>-</sup>, pHH3<sup>-</sup>, and pRB<sup>-</sup>) and induction of apoptosis (cPARP<sup>+</sup>). **c**) Trellis hierarchy for single-cell PDO on-target drug responses leveraging cell-state branches and randomized PTM and DNA-damage parameters. Trellis scores are calculated per PDO by comparing untreated controls to drugs for both mono-cultures and co-cultures. CB1, Cyclin B1. **d**) Sankey diagram showing data from **b**) distributing through the Trellis layout in **c**) (terminal leaves not shown).

## 130 Trellis Single-Cell Analysis of PDO Cell-State and PTM Signaling

131 Anti-cancer drugs typically induce major shifts in cell-cycle and apoptosis that can be detected by mass  
 132 cytometry. For example, SN-38 inhibits topoisomerase 1 [36], resulting in S-phase blockage, cell-cycle  
 133 exit, and induction of apoptosis (Figure 2b). Similarly, 5-FU blocks nucleotide biosynthesis by inhibiting  
 134 thymidylate synthase [37] which subsequently stalls S-phase entry, whereas oxaliplatin induces ribosome  
 135 biogenesis stress to block mitotic progression [38]. Capturing shifts in cell-state is therefore crucial for  
 136 understanding on-target drug responses in single-cell data.

137 In mass cytometry, cell-state is identified by hierarchical gating of pRB, IdU, pHH3, Cyclin B1, and  
 138 cPARP/cCaspase3 [39, 40] and is therefore well suited for Trellis branches. For cell-type-specific analysis  
 139 of PDO-CAF co-cultures we designed a Trellis hierarchy using cell-state-driven branches that supervene  
 140 upon randomized DNA-damage and PTM signaling leaves (Figure 2c) (Figure S4a). This tree topology  
 141 sensitizes Trellis to canonical on-target drug-induced shifts in cell-cycle and apoptosis while also leveraging  
 142 latent changes in DNA-damage and PTM signaling (Figure 2d) (Figure S4b-e).

## 143 **Trellis Analysis of Cell-Type-Specific PDO-CAF Drug Responses**

144 We used Trellis to analyze 3,360 (1,680 PDO, 1,680 CAF) single-cell PTM profiles (>25 million single-  
145 cells) (Figure 3a) in order to explore drug-, patient-, and microenvironment-specific therapy responses for  
146 both PDOs (Figure 3b-d) and CAFs (Figure S5). Since Trellis performs pairwise normalization to internal  
147 controls, all controls group on the left side of the graph (Figure 3b) (Figure S1a) and each treatment embeds  
148 relative to their controls, depending on their distribution through the Trellis tree. This enables therapeutic  
149 effects to be visualized across PHATE 1 and mechanistic response in PHATE 2 (Figure S6). If the same drug  
150 were to have an equal effect on all PDOs, Trellis would group each condition by drug type. However,  
151 Trellis revealed PDO treatment effects are characterized not by drug type, but by patient-specific signaling  
152 responses.

153 We observed four patient-grouped responses to 5-FU, SN-38, and oxaliplatin chemotherapies: 1) broadly  
154 chemosensitive with high apoptosis (PDOs 21 and 75), 2) broadly chemosensitive with apoptosis and a  
155 strong DNA-damage response (PDOs 23 and 27), 3) anecdotally chemosensitive (i.e. only apoptotic with a  
156 specific drug) (PDOs 99 and 109), and 4) chemorefractory with minimal apoptosis and low DNA-damage  
157 response (PDOs 05, 11, 141, and 216). Cetuximab, Berzosertib, and LGK974 generally had modest effects  
158 on PDO cell-state and PTMs relative to chemotherapies (Figure 3b) (Figure S6). While PDOs demonstrate  
159 clear patient- and microenvironment-specific drug responses, CAF signaling does not cluster by patient or  
160 drug (Figure S5), suggesting chemotherapies mainly alter the cell-state, DNA-damage, and PTM profiles of  
161 PDOs, not CAFs. Trellis further revealed CAFs protect some PDOs from chemotherapies (Figure 3d).

## 162 **PDO Drug Signaling Responses Are Patient-Specific**

163 PDOs have been proposed as personalized avatars of drug response [10], but how clinical treatments  
164 mechanistically alter patient-specific PDO biology is not well understood. To explore patient-specific drug  
165 response signaling, we updated the designed branches of the Trellis tree by combining cell-state parameters  
166 with a pHH2AX [S139] detection layer to enrich on-target DNA double-strand breaks and analyzed each  
167 patient drug response in parallel (Figure S7a-d). Patients continue to display either broad (PDOs 21, 23,  
168 27, and 75) or anecdotal (PDOs 99 and 109) chemotherapeutic sensitivity, and multiple examples of drug  
169 insensitivity (Figure 4a).

170 Unlike univariate live/dead metrics used in traditional drug screens, *TOBis* mass cytometry can detect  
171 on-target treatment effects that do not result in cell death. For example, SN-38 induces on-target S-phase  
172 blockage and double-strand breaks in both PDO 21 and PDO 05, yet only PDO 21 translates genotoxic stress  
173 into apoptosis (Figure 4b). Similarly, in PDOs 23 and 99, 5-FU and SN-38 result in a large DNA-damage  
174 response and stalled mitosis respectively, but no apoptosis (Figure S7e). 5-FU and SN-38 can clearly induce  
175 double-strand breaks and cell-cycle arrest in these PDOs, but they do not translate genotoxic replication  
176 stress into cell death. In fact, across nearly all PDOs tested, SN-38 (Figure S7f), oxaliplatin (Figure S7g),  
177 and 5-FU (Figure S7h) display on-target mitotic arrest (83%), but only a subset of patient and treatment  
178 combinations trigger apoptosis (40%). This suggests on-target drug responses are common in CRC PDOs,  
179 but often insufficient to induce cell death.

180 The patient-specific drug sensitivity demonstrated by several PDOs reinforces the notion that PDOs  
181 could be used to identify drugs uniquely potent to an individual's cancer. For example, in PDO 99, 5-FU  
182 blocks mitosis and SN-38 causes a large DNA-damage response – yet neither chemotherapy induces sub-  
183 stantial apoptosis. However, when treated with oxaliplatin, PDO 99 exits the cell-cycle and enters apoptosis  
184 (Figure S7e). Unlike 5-FU and SN-38, oxaliplatin does not kill cells directly through blocking S-phase,  
185 but via inducing ribosome biogenesis stress [38]. PDO 99 appears refractory to cytostatic stress but hy-

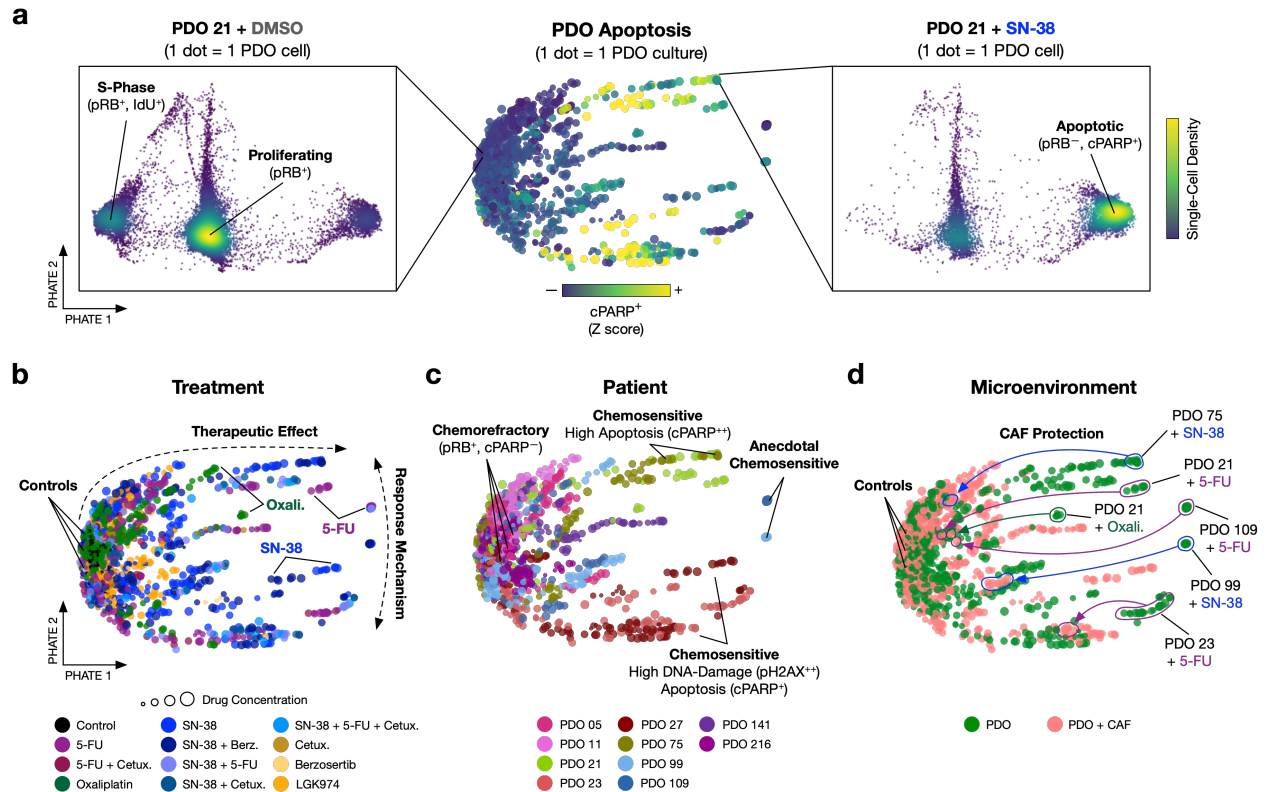

**Figure 3: Trellis Analysis of Single-Cell PDO-CAF Drug Responses.** **a)** Trellis-Phate of 1,680 PDO single-cell PTM profiles (1 dot = 1 organoid culture comprising >5,000 single-cells) colored by apoptosis with representative single-cell density embeddings of PDO 21 + DMSO or + SN-38. **b)** PDO drug treatment-specific responses. Controls group on the left, with treatment effects spreading across PHATE 1 and response mechanisms resolving across PHATE 2. **c)** Patient-specific drug responses illustrate different chemosensitive mechanisms and chemorefractory patients. **d)** CAFs provide patient-specific chemoprotection from 5-FU, SN-38, and oxaliplatin.

186 persensitive to ribosome biogenesis stress. Similarly, ATR inhibitors block single-stranded DNA-damage  
 187 response and typically synergize with DNA-damage inducing drugs [18]. However, we find Berzosertib  
 188 only increases SN-38-induced apoptosis in MSI PDOs (Figure S8), suggesting ATR inhibitors might only  
 189 be effective in MSI patients.

### 190 Chemosensitive PDOs Have Distinct Cell-Intrinsic PTM Signaling Profiles

191 We next sought to understand features common to chemosensitive and chemorefractory PDOs. Ther-  
 192 apeutic response does not correlate with MSI/MSS status, clinical staging, anatomical location, *KRAS*, or  
 193 *APC* genotypes (Figure S9a) (Table S1). However, baseline PDO cell-state and PTM signaling profiles  
 194 are patient-specific and align with chemosensitivity (Figure 4c) (Figure S9b-d). Chemosensitive PDOs 21,  
 195 23, 27, and 75 are highly proliferative at baseline and experience canonical S-phase blockage, increased  
 196 DNA-damage, and apoptosis when treated with both 5-FU and SN-38. In contrast, chemorefractory PDOs  
 197 generally have lower cell-intrinsic mitotic activity than chemosensitive PDOs (Figure 4c). When treated  
 198 with 5-FU, SN-38, and oxaliplatin, chemorefractory PDOs experience a reduction in S-phase and blocked

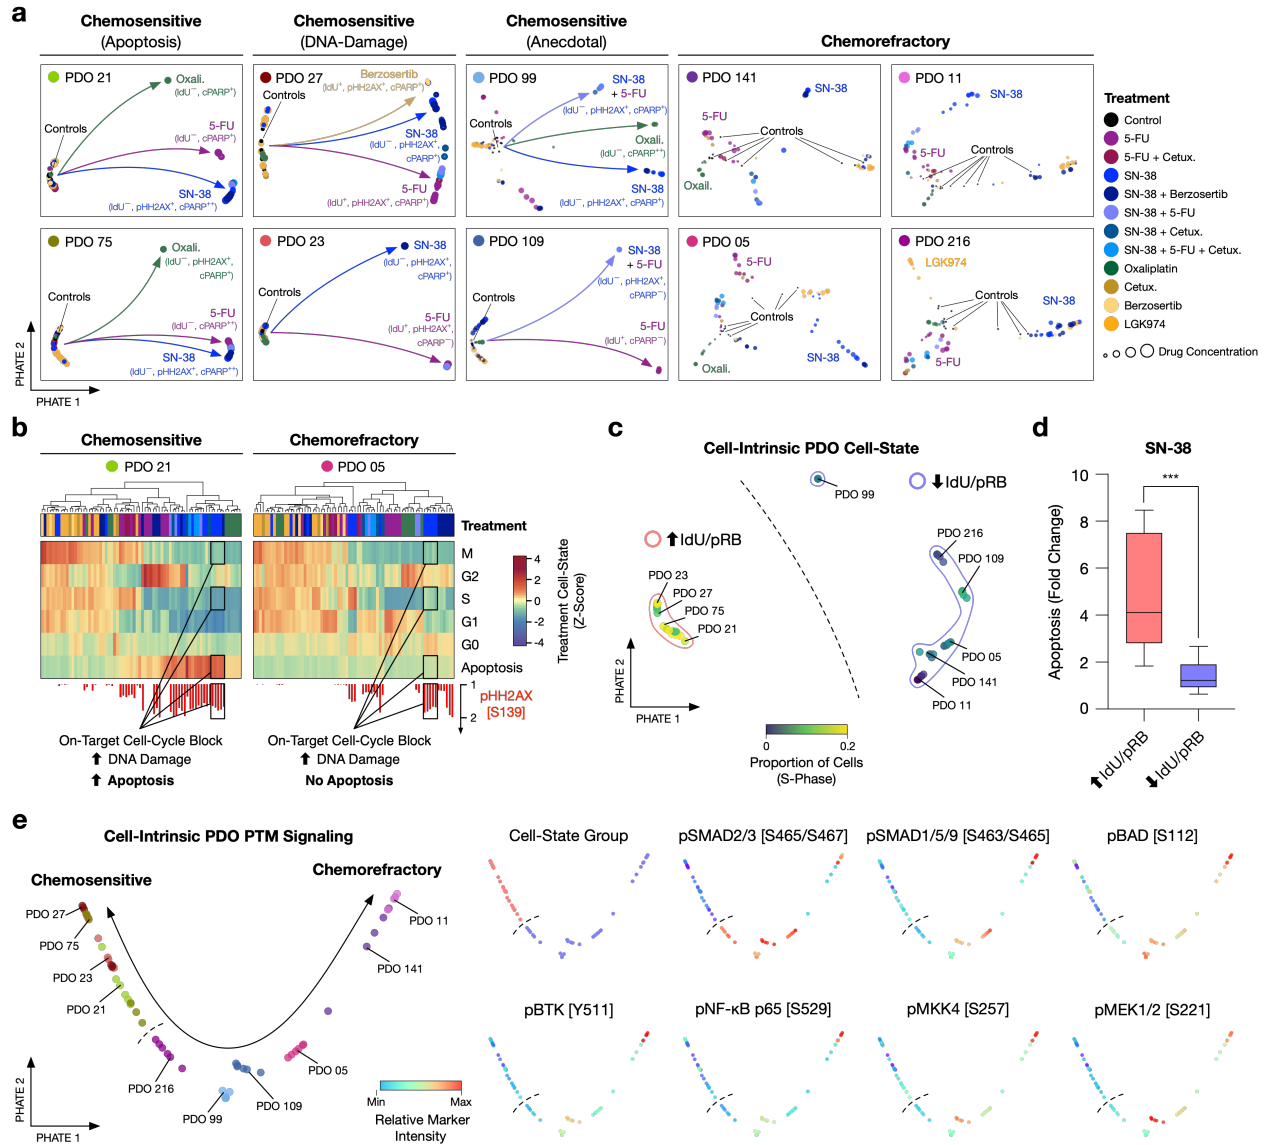

**Figure 4: PDO Drug Response Mechanisms Are Patient-Specific and Align With Cell-Intrinsic Cell-State and PTM Signaling.** **a)** Trellis-PHATE patient-specific PDO drug responses (840 single-cell PTM datasets). **b)** Patient-specific distribution of cells within Trellis branches reveals on-target cell-state shifts upon drug treatments. Treatment cell-state quantifies the fold change of the proportion of cells/cell state over the controls for each treatment (Z-score). DNA damage is quantified by the fold change of the proportion pHH2AX<sup>+</sup> cells over the controls. **c)** Trellis-PHATE resolves high IdU/pRB (red outline) and low IdU/pRB (blue outline) cell-intrinsic cell-state PDO groups (colored by proportion of cells in S-phase). **d)** SN-38-induced apoptosis in low IdU/pRB and high IdU/pRB PDOs. Unpaired *t*-test, \*\*\* <0.001. **e)** TreEMD-PHATE of cell-intrinsic PTM signaling nodes demonstrates PTMs up-regulated in chemorefractory PDOs.

199 M-phase consistent with on-target drug responses, but generally elicit a lower double-strand break response  
 200 compared to chemosensitive patients and do not activate PARP or Caspase3 (Figure 4d) (Figure S7e). This  
 201 suggests that even chemorefractory PDOs experience on-target drug responses, but their slow mitotic sig-



202 naling flux at point of treatment means drug-induced cytostatic stress is insufficient to trigger widespread  
203 DNA-damage and apoptosis. Chemorefractory PDOs typically have high levels of cell-intrinsic pSMAD2/3,  
204 pSMAD1/5/9, pMKK4, pBAD, pBTK, and pNF- $\kappa$ B signaling (Figure 4e) – suggesting these pathways re-  
205 late to a chemorefractory cell-state. In summary, TOBis mass cytometry and Trellis reveal on-target drug  
206 performance is common in CRC PDOs (even in chemorefractory PDOs) but cytotoxicity is patient-specific  
207 and correlates with cell-intrinsic PDO cell-states and PTM signaling.

## 208 **CAFs Chemoprotect PDOs by Altering PDO Cell-State**

209 CAFs have both pro- and anti-cancer roles across a variety of solid tumors, but to what extent these  
210 effects are patient-specific is poorly understood [4]. Trellis analysis of all CRC PDOs revealed CAFs can  
211 chemoprotect chemosensitive PDOs in a patient-specific manner (Figure 3d). To functionally explore the  
212 role of CAFs in patient-specific CRC PDO drug responses, we performed paralleled analysis of PDO mono-  
213 cultures and PDO-CAF co-cultures following drug treatments (Figure 5a). Trellis revealed CAFs provide  
214 varying degrees of chemoprotection in a patient- and drug-specific manner. For example, CAFs completely  
215 protect chemosensitive PDOs 21 and 75 from SN-38, 5-FU, and oxaliplatin-induced apoptosis, whereas  
216 PDOs 23, 27, and 99 only experience partial chemoprotection (Figure S10c). Chemorefractory PDOs 05,  
217 11, and 141 are largely unaffected by CAFs. This dichotomy suggests CAFs deregulate cancer cells in a  
218 patient-specific manner.

219 We next sought to understand why CAFs have such different patient-specific regulation of PDO drug  
220 response. Chemosensitive PDOs 21 and 75 are highly proliferative in monoculture but reduce cell-cycle  
221 activity when co-cultured with CAFs (Figure 5b) (Figure S10a). CAFs that protect PDOs also have a distinct  
222 PTM signaling profile in co-culture (Figure 5c), suggesting patient-specific reciprocal signaling between  
223 PDOs and CAFs occurs during chemoprotection. Crucially, CAFs do not cause protected PDOs to exit the  
224 cell-cycle, but instead reduce MAPK and PI3K signaling, increase TGF- $\beta$ , JNK, and NF- $\kappa$ B signaling, and  
225 slow PDO S-phase entry — rendering PDOs less vulnerable to chemotherapies (Figure 5d). Notably, these  
226 pathways are also cell-intrinsically active in chemorefractory PDOs (Figure 4e). CAFs also dramatically  
227 alter the macro structure of PDOs, with chemoprotected PDOs switching from an enveloped to cyst-like  
228 morphology. PDOs that do not benefit from CAF chemoprotection do not experience morphological shifts.  
229 Collectively, we find that CAFs can rapidly regulate PTM signaling networks in PDOs to shift previously  
230 chemosensitive cancer cells towards a chemorefractory cell-state.

## 231 **Inhibiting YAP Re-sensitizes CAF-Protected PDOs**

232 Mechanistic understanding of drug responses by single-cell signaling analysis could identify opportuni-  
233 ties to rationally re-sensitize refractory PDOs [41]. For example, Trellis revealed CAFs protect chemosen-  
234 sitive PDOs from SN-38 — not by reducing on-target S-phase blockage or DNA-damage — but by shifting  
235 cancer cells towards a slow-cycling cell-state (Figure 6a-d) (Figure S10a-c). This was most clearly observed  
236 in PDO 21, where CAFs activate PDO TGF- $\beta$ , JNK, and NF- $\kappa$ B signaling and suppress mitotic MAPK  
237 and PI3K pathways (Figure 6e). CCD-18Co colon fibroblasts also chemoprotect PDO 21, suggesting PDOs  
238 have a common cell-state response to mesenchymal cues (Figure S10e-g).

239 It has recently been shown that CRC cells can escape chemotherapy by differentiating towards a slow-  
240 cycling ‘diapause’ [42] or revival stem cell (revSC) fate [43]. In the healthy intestine, revSCs can be  
241 induced by fibroblast-derived TGF- $\beta$  during tissue damage and demonstrate low cell-cycle activity and high  
242 levels of SMAD and YAP signaling [44]. While TOBis mass cytometry revealed CAF-protected PDOs  
243 have low cell-cycle activity, high TGF- $\beta$  signaling, and low MAPK and PI3K flux, cytometry technologies

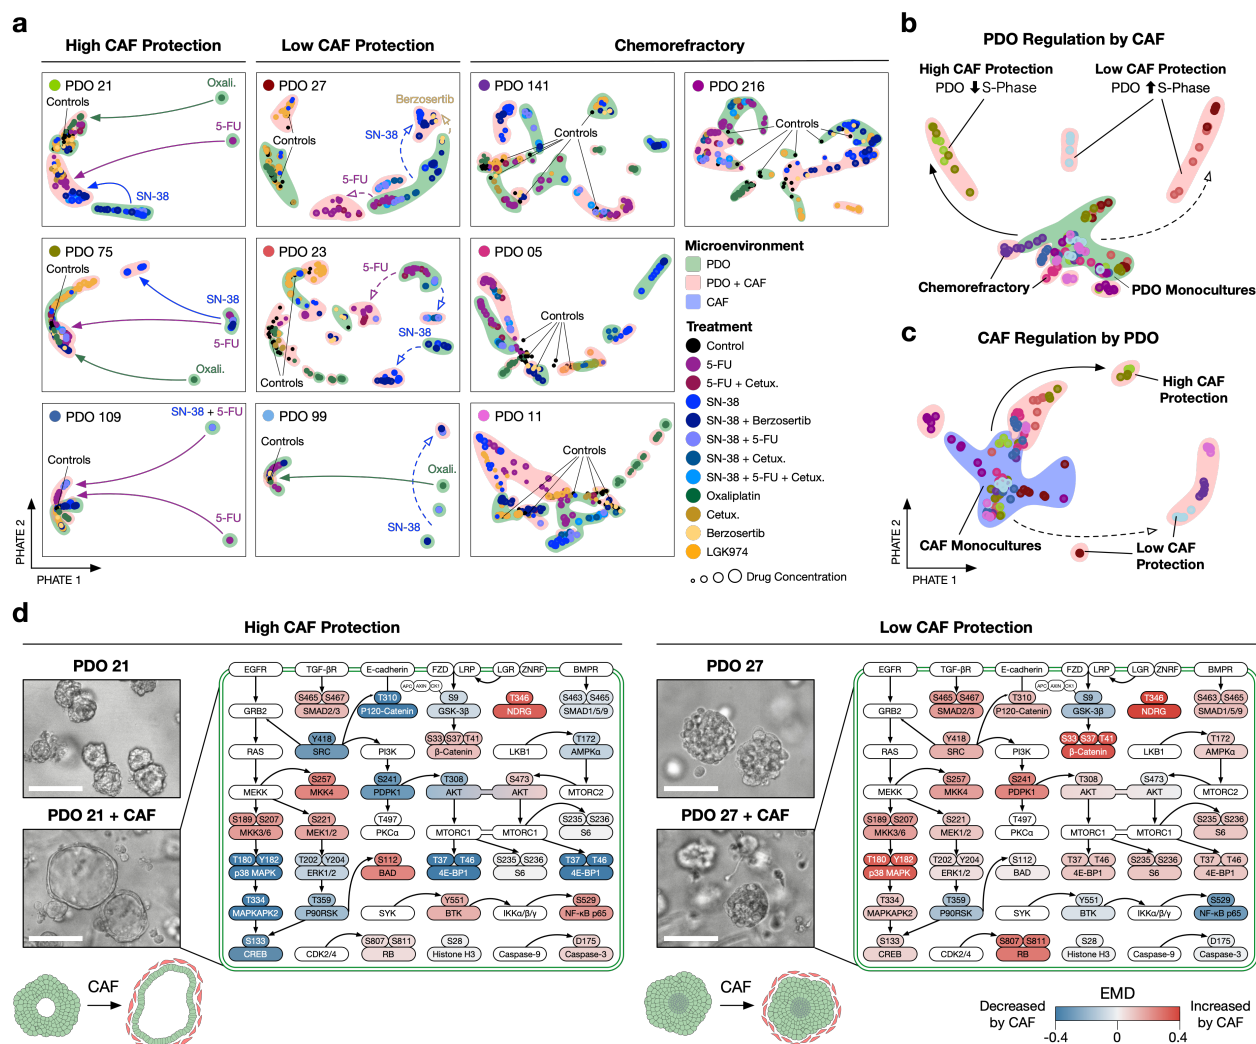

**Figure 5: CAFs Chemoprotect PDOs by Altering PDO Cell-State.** a) Trellis-PHATE of patient-specific PDO PTM drug responses with or without CAFs illustrates CAFs can protect PDOs from therapy (1,680 PDO-CAF cultures). Dots colored by treatment, outlines colored by microenvironment. Solid arrows refer to full protection, dashed arrows refer to low protection by CAFs. b) Alterations of PDO cell-state and PTM signaling by CAFs correlates with chemoprotection. Dots correspond to 6 replicates colored by PDO. c) Baseline CAF cell-state and PTM signaling when co-cultured with PDOs correlates with chemosensitivity protection. Dots correspond to 6 replicates colored by PDO. d) CAF regulation of PTM signaling networks in PDO 21 and PDO 27. CAFs downregulate MAPK and PI3K pathways and upregulate SMAD, NF- $\kappa$ B, and BAD signaling nodes in protected PDOs. Scale bar = 200  $\mu$ m.

244 cannot measure nuclear protein translocation and therefore cannot detect YAP activation. However, YAP  
 245 immunofluorescence revealed CAFs also induce nuclear YAP translocation in chemoprotected PDOs (Figure  
 246 6f) — collectively suggesting CAFs shift PDOs towards a revSC-like cell-state.

247 Using PTM signaling and cell-state insights provided by single-cell drug screening, we hypothesized  
 248 that CAF chemoprotection could be YAP-dependent. To test this, we treated PDO 21 + CAF cultures +/-  
 249 Verteporfin (YAP-TEAD complex inhibitor), +/- SN-38 and measured PTM and cell-state responses using

250 TOBis mass cytometry (Figure 6g). YAP inhibition alone did not induce apoptosis in PDO 21 either in  
 251 monoculture or in co-culture with CAFs. However, we found Verteporfin completely re-sensitizes CAF-  
 252 protected PDOs to SN-38-induced apoptosis. Crucially, YAP inhibition did not increase on-target SN-38-  
 253 induced DNA-damage in PDO 21 and did not regulate CAF cell-cycle or apoptosis. YAP inhibition restored  
 254 PDOs to an enveloped morphology when in co-culture with CAFs (Figure S11) — indicating YAP inhibition  
 255 targets the unique CAF-induced PDO cell-state. These results demonstrate that CAFs can chemoprotect  
 256 PDOs via a YAP-driven revSC cell-state switch and underscore the value of mechanism-focused single-cell  
 257 drug screening in overcoming therapy resistance.

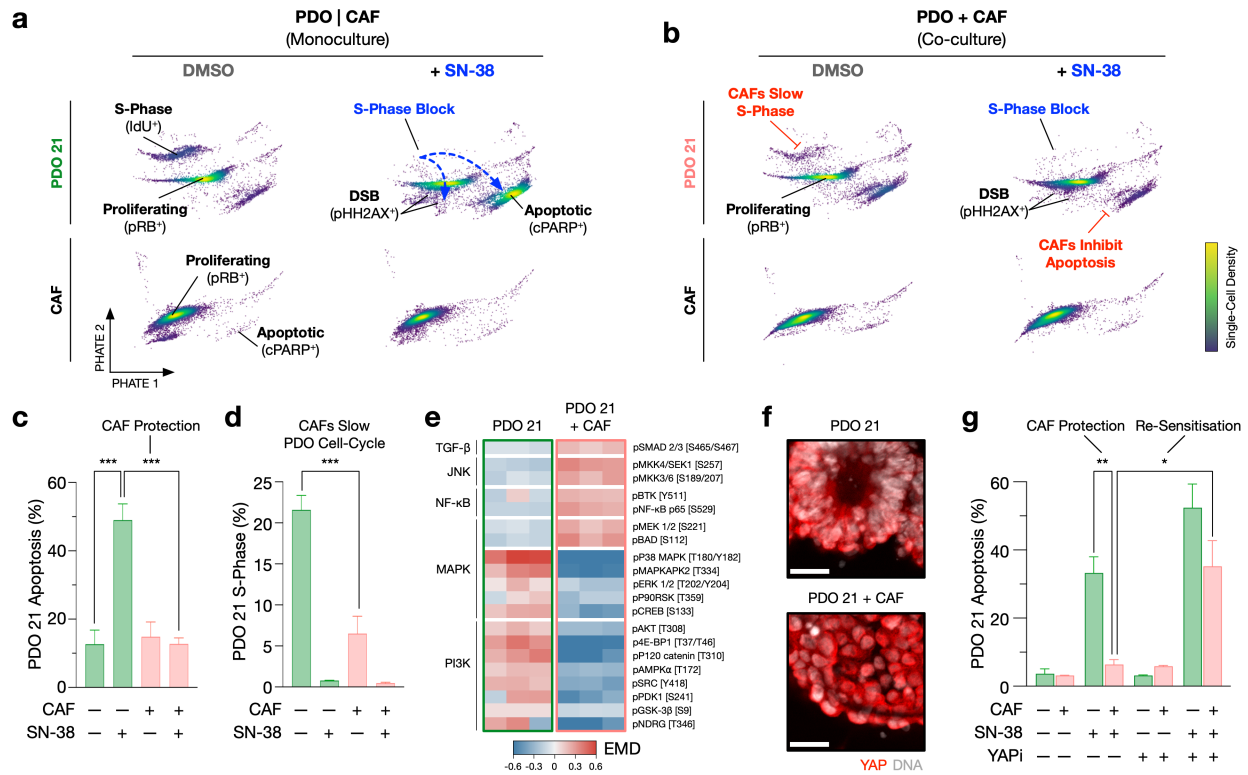

**Figure 6: CAF Chemoprotection is Reversed By Inhibiting YAP. a-b)** Single-cell density PHATEs of PDO 21 and CAFs during SN-38 treatment illustrates cell-state shifts by drug and co-culture (5,000 cells). **c)** CAFs protect PDOs from SN-38-induced apoptosis. **d)** CAFs slow PDO S-phase entry and PDOs experience on-target S-phase blockage by SN-38 irrespective of CAFs. **e)** EMD heatmap of PTMs in PDO 21 +/- CAFs demonstrate CAFs regulate PDO PTM signaling. **f)** CAFs induce nuclear translocation of YAP (red) to PDO nucleus (white). Scale bar = 25 μm **g)** Verteporfin (YAPi) completely re-sensitizes CAF-protected PDOs to SN-38-induced apoptosis. Unpaired *t*-test, \*\*\* < 0.0001, \*\* < 0.001, \* < 0.01.

### 258 3 Discussion

259 PDOs have been widely proposed as personalized avatars of patient-specific drug responses [45]. How-  
 260 ever, bulk screening technologies have limited previous studies to PDO monocultures alone and provide  
 261 no mechanistic insight into PDO drug response [13]. Using highly-multiplexed single-cell PTM profil-  
 262 ing by TOBis mass cytometry and hierarchical treatment effect analysis by Trellis, we demonstrate PDO

263 drug response signaling is patient-specific and reveal CAFs regulate PDO chemosensitivity by altering PDO  
264 signaling and cell-state. PDO-CAF interactions are also patient-specific, with CAFs both stimulating and  
265 repressing PTM signaling and cell-cycle activity in a patient-specific manner. Crucially, we demonstrate  
266 mechanistic profiling of patient-specific drug responses can be used to re-sensitize CAF-protected PDOs.

267 Unlike static diagnostic metrics (e.g. pharmacogenomics) that have failed to substantially advance preci-  
268 sion oncology [45], PDOs are functional biopsies that can be experimentally tested to reveal patient-specific  
269 drug responses alongside clinical care in real-time [46–48]. However, recent studies have suggested PDOs  
270 alone are not sufficient to biomimetically predict drug response. For example, only 20% of monoculture  
271 drug combination ‘hits’ could be validated in *ex vivo* organotypic CRC tumours containing a TME [46], and  
272 growth factor regulation of PDO cell-state can change pancreatic ductal adenocarcinoma (PDAC) organoid  
273 drug responses [49]. Our results reveal PDO-CAF interactions are a source of functional inter-tumor hetero-  
274 geneity and the role of CAFs should not be generalized. Given that cell-extrinsic signals can have dramatic  
275 effects on drug performance, we propose TME cells should be considered in future studies evaluating PDOs  
276 as personalized functional biopsies.

277 Phenotypic plasticity is an emerging hallmark of cancer [50] and therapeutic targeting of cancer-specific  
278 cell-states is a growing area of cancer research [51, 52]. As stem cell-driven model systems, PDOs are  
279 capable of high differentiation plasticity [8] and are therefore well-suited to studying drug- or TME-induced  
280 cancer cell plasticity. We observed that PTM cell-state (not MSI/MSS status, tumor stage, anatomical loca-  
281 tion, or genotype) aligned with patient-specific drug response (Figure 4c-d) (Figure S9) and found CAFs can  
282 transition PDOs into a refractory cell-state to protect PDOs from specific therapies. A recent survey of CRC  
283 concluded phenotypic plasticity is largely driven by transcriptional changes, not genotype [53] and work  
284 in PDAC has demonstrated PDO transcriptional profiles, not genotype, correlate with drug response [54].  
285 Moreover, recent studies of oncogenic [55] and kinase [56] activity suggest cancer cell signaling flux pre-  
286 dicted patient survival better than genotype. Taken with our observations, mounting evidence suggests metrics  
287 that more closely describe cancer cell-state such as transcription and PTM signaling may more accurately  
288 predict patient-specific drug responses than genomic profiles or clinical staging. Combining the plasticity  
289 of PDO models with mechanism-focused single-cell analysis technologies will enable characterization of  
290 cell-state plasticity and therapy-induced canalization in cancer.

291 In contrast to traditional live/dead drug screens, TOBis mass cytometry reveals molecular insights into  
292 PDO drug responses. We observed PDOs frequently experience on-target drug responses (83%), but only a  
293 subset of PDOs enter drug-induced apoptosis (40%). This suggests chemorefractory PDOs do not translate  
294 cytostatic and genotoxic stress into apoptosis. Single-cell PTM profiling further revealed CAFs chemo-  
295 protect PDOs by shifting cancer cells into a slow-cycling revSC-like cell-state. We used this mechanistic  
296 insight to re-sensitize PDOs by blocking revSC activation via YAP. Given that drug synergy is rare when  
297 using unbiased screens [57], our study suggests mechanism-focused screening could be used to rapidly  
298 identify rational drug synergies to re-sensitize refractory cancers.

299 The advent of high-dimensional single-cell technologies such as mass cytometry and scRNA-Seq pro-  
300 vides new opportunities to study heterogeneous drug response mechanisms beyond simple viability scores  
301 [13]. However, high-dimensional drug screening data is challenging to interpret — with existing tools  
302 designed to analyze dozens, not thousands of samples. Trellis overcomes this scalability bottleneck by  
303 distributing single-cell data across a tree domain structure, enabling the KR norm between thousands of  
304 single-cell samples to be computed rapidly. While we use cell-state branches to sensitize Trellis results  
305 towards canonical on-target anti-cancer drug responses, alternative branching structures could in theory be  
306 designed to enrich for PTM signaling hierarchies (e.g. for kinase inhibitor screens) or cell-type hierarchies  
307 (e.g. in immune profiling) (Figure S3). Trellis’ scalability is independent of supervening branches and is

308 therefore a flexible platform for future single-cell screening applications.

309 Although this study has focused on PDOs and CAFs, single-cell technologies also enable mechanistic  
310 analysis of organoid-leukocyte co-culture models [13]. In addition to studying the role of leukocytes in  
311 regulating chemical drug responses, single-cell PTM analysis could be a powerful approach to study pre-  
312 clinical co-culture organoid models of anti-solid tumor cellular biotherapeutics (e.g. CAR-T cells) where  
313 understanding the biology of the drug (engineered T-cell) is as important as the PDO target-cell killing. This  
314 study demonstrates high-throughput single-cell screening of heterocellular drug interactions is feasible and  
315 we expect the technology will be rapidly adapted to study biological therapies.

316 In summary, we demonstrate highly-multiplexed single-cell PTM profiling by TOBis mass cytometry  
317 and hierarchical treatment effect analysis by Trellis can reveal patient-specific drug responses in thousands  
318 of PDO-CAF cultures. CAFs regulate PDO drug response by altering PDO cell-state in a patient-specific  
319 manner and PTM signaling insights can be used to overcome CAF protection. We propose single-cell PTM  
320 analysis as a powerful alternative to traditional bulk viability analysis of PDOs and suggest TME cells should  
321 be considered in future precision medicine models.

## 322 4 Methods

### 323 4.1 CRC PDO and CRC CAF Culture

324 CRC PDOs were obtained from the Human Cancer Models Initiative (Sanger Institute, Cambridge, UK)  
325 [12] and expanded in 12-well plates (Helena Biosciences 92412T) in x3 25  $\mu$ L droplets of Growth Factor  
326 Reduced Matrigel (Corning 354230) per well with 1 mL of Advanced DMEM F/12 (Thermo 12634010)  
327 containing 2 mM L-glutamine (Thermo 25030081), 1 mM N-acetyl-L-cysteine (Sigma A9165), 10 mM  
328 HEPES (Sigma H3375), 500 nM A83-01 (Generon 04-0014), 10  $\mu$ M SB202190 (Avantor CAYM10010399-  
329 10), and 1X B-27 Supplement (Thermo 17504044), 1X N-2 Supplement (Thermo 17502048), 50 ng ml<sup>-1</sup>  
330 EGF (Thermo PMG8041), 10 nM Gastrin I (Sigma SCP0152), 10 mM Nicotinamide (Sigma N0636), and  
331 1X HyClone Penicillin-Streptomycin Solution (Fisher SV30010), and conditioned media produced as de-  
332 scribed in [58] at 5 % CO<sub>2</sub>, 37 °C. PDOs were dissociated into single cells with 1X TripLE Express Enzyme  
333 (Gibco 12604013) (incubated at 37 °C for 20 minutes) and passaged every 10 days. L-cells for conditioned  
334 media production were obtained from Shintaro Sato (Research Institute of Microbial Diseases, Osaka Uni-  
335 versity, Osaka, Japan). To aid cell-type-specific visualization and gating, CRC PDO were transfected with  
336 H2B-RFP (Addgene 26001). CRC CAFs (+GFP) were a kind gift from Prof. Olivier De Wever (University  
337 of Gent) [16, 17]. CAFs and CCD-18Co fibroblasts (ATCC CRL-1459) were cultured in DMEM (Thermo  
338 11965092) enriched with 10 % FBS (Gibco 10082147), and 1X HyClone Penicillin-Streptomycin Solution  
339 (Fisher SV30010) at 5% CO<sub>2</sub>, 37 °C.

### 340 4.2 PDO-CAF Drug Treatments

341 PDOs were dissociated into single cells on day 0, and expanded in 12-well plates in Growth Factor  
342 Reduced Matrigel (Corning 354230) with Advanced DMEM F/12 (Thermo 12634010) containing 2 mM L-  
343 glutamine (Thermo 25030081), 1 mM N-acetyl-L-cysteine (Sigma A9165), 10 mM HEPES (Sigma H3375),  
344 1X B-27 Supplement (Thermo 17504044), 1X N-2 Supplement (Thermo 17502048), 50 ng ml<sup>-1</sup> EGF  
345 (Thermo PMG8041), 10 nM Gastrin I (Sigma SCP0152), 10 mM Nicotinamide (Sigma N0636), 500 nM  
346 A83-01 (Generon 04-0014), 10  $\mu$ M SB202190 (Avantor CAYM10010399-10) and 1X HyClone Penicillin-  
347 Streptomycin Solution (Fisher SV30010) at 5% CO<sub>2</sub>, 37 °C for 4 days. On day 5, PDOs were starved in  
348 Reduced media (containing only 2 mM L-glutamine, 1 mM N-acetyl-L-cysteine, 10 mM HEPES, 1X B-27  
349 Supplement, 1X N-2 Supplement, 10 mM Nicotinamide, and 1X HyClone-Penicillin Streptomycin Solution)  
350 at 5 % CO<sub>2</sub>, 37 °C. In parallel, CAFs were starved in 2 % FBS DMEM with 1X Hyclone-Penicillin Strep-  
351 tomycin Solution. PDOs and CAFs were seeded on day 6 in 96-well plates (Helena Biosciences 92696T)  
352 in 50  $\mu$ L Matrigel stacks with 300  $\mu$ L of reduced media. PDO monocultures are seeded at a density of ~  
353 1.5 x 10<sup>3</sup> organoids/well, and CAFs at 2.5 x 10<sup>5</sup> cells/well, co-cultures were mixed in Matrigel on ice at the  
354 densities described, and seeded together on the plates for polymerization. On day 7, media was replaced  
355 with titrated concentrations of SN-38 (Sigma H0165), 5-FU (Merck F6627), Oxaliplatin (Merck O9512),  
356 Cetuximab (MedChem Express HY-P9905), VX-970 (Stratech), and LGK-974 (Peprotech 1241454) (Ta-  
357 ble S2) diluted in Reduced media. On day 8, media was replaced with the corresponding treatments (same  
358 as on day 7). After 72 hours of co-culture, and 48-hours of treatment (day 9), cultures were processed for  
359 TOBis mass cytometry (see below). Verteporfin (Cambridge Bioscience CAY17334) was used at 100 nM as  
360 above.

### 361 4.3 PDO-CAF TOBis Mass Cytometry

362 PDO-CAF co-cultures were analyzed using the TOBis mass cytometry protocol outlined in detail by  
363 Sufi and Qin *et al.*, Nature Protocols, 2021 [15]. Briefly, following drug treatment, PDO-CAF cultures  
364 were incubated with 25  $\mu\text{M}$  (5-Iodo-2'-deoxyuridine) ( $^{127}\text{IdU}$ ) (Fluidigm 201127) at 37 °C for 30 min-  
365 utes, and 5 minutes before the end of this incubation, 1X Protease Inhibitor Cocktail (Sigma, P8340) and  
366 1 XPhosSTOP (Sigma 4906845001) are added into the media. After the incubation with  $^{127}\text{IdU}$ , protease  
367 inhibitors and PhosSTOP, each well is fixed in 4 % PFA/PBS (Thermo J19943K2) for 1 hour at 37 °C. PDO-  
368 CAFs were washed with PBS, dead cells were stained using 0.25  $\mu\text{M}$   $^{194}\text{Cisplatin}$  (Fluidigm 201194), and  
369 PDO-CAF were barcoded *in situ* with 126-plex (9-choose-4) TOBis overnight at 4 °C. Unbound barcodes  
370 were quenched in 2 mM GSH and all PDO-CAF were pooled. PDO-CAF were dissociated into single-  
371 cells using 1 mg ml $^{-1}$  Dispase II (Thermo 17105041), 0.2 mg ml $^{-1}$  Collagenase IV (Thermo 17104019),  
372 and 0.2 mg ml $^{-1}$  DNase I (Sigma DN25) in C-Tubes (Miltenyi 130-096-334) via gentleMACS™ Octo  
373 Dissociator with Heaters (Miltenyi 130-096-427). Single PDO and CAF cells were washed in cell stain-  
374 ing buffer (CSB) (Fluidigm 201068) and stained with extracellular rare-earth metal conjugated antibodies  
375 (Table S3) for 30 minutes at room temperature. PDO-CAF were then permeabilized in 0.1 % (vol/vol)  
376 Triton X-100/PBS (Sigma T8787), 50 % methanol/PBS (Fisher 10675112), and stained with intracellular  
377 rare-earth metal conjugated antibodies for 30 minutes at room temperature. PDO-CAF were then washed  
378 in CSB and antibodies were cross-linked to cells using 1.6 % (vol/vol) FA/PBS for 10 minutes. PDO-CAF  
379 were incubated in 125 nM  $^{191}\text{Ir}/^{193}\text{Ir}$  DNA intercalator (Fluidigm 201192A) overnight at 4 °C. PDO-CAF  
380 were washed, resuspended in 2 mM EDTA (Sigma 03690) in water (Fluidigm 201069), and analyzed us-  
381 ing a Helios Mass Cytometer (Fluidigm) fitted with a 'Super Sampler' (Victorian Airships) or CyTOF XT  
382 (Fluidigm) at 200-400 events s $^{-1}$ .

### 383 4.4 TOBis Mass Cytometry Data Preprocessing

384 Multiplexed FCS files were debarcoded into separate experimental conditions by using the Zunder Lab  
385 Single Cell Debarcoder (<https://github.com/zunderlab/single-cell-debarcoder>)  
386 [19]. Debarcoded FCS files were uploaded to Cytobank (Beckman Coulter), gated for Gaussian parame-  
387 ters, and DNA ( $^{191}\text{Ir}/^{193}\text{Ir}$ ). Epithelial cells were gated on PCK $^{+}$  and EpCAM $^{+}$ , and CAFs were gated  
388 on Vimentin $^{+}$  and GFP $^{+}$ . Arcsinh transformed values were mean centered across batches before Trellis  
389 analysis.

### 390 4.5 Trellis Computational Background

391 Single-cell data are being collected in experiments with ever more numerous conditions in order to  
392 characterize libraries of treatments [59] including small-molecules [60] and gene-perturbations [61]. One  
393 method that directly generalizes bulk measurements to single-cell samples is through the theory of optimal  
394 transport and more specifically, the Wasserstein distance [22–24].

395 Optimal transport is well suited to the formulation of distances between collections of points, as it gen-  
396 eralizes the notion of distances between points to distances between distributions. Intuitively, the distance  
397 between distributions should be the minimum total work to move a pile of dirt located at a source distribu-  
398 tion to a target distribution. This framework yields a natural definition of similarity between experimental  
399 conditions, namely two conditions are similar when their collections of cells are not far from each other.

400 These distances aim at answering a deeper question: *Which treatments have similar and different effects*  
401 *on the system?* To answer this question we need a metric between changes to densities. We assume that for

each treated condition  $X$  we have access to an associated control condition  $X_c$ . When all treated conditions are measured relative to a single  $X_c$  we show approaches based on the Wasserstein distance are a valid metric between changes in densities. However, in larger experiments it is impossible to measure all treated conditions within a single batch, and thus treated conditions may have different controls. In this case, we show that Wasserstein-based approaches fail, and show that a generalization to an approach based on the *Kantorovich and Rubinstein norm* gives a valid metric between changes in densities in this more general multi-control case.

#### 4.5.1 Integral Probability Metrics

Integral probability metrics (IPMs) are metrics over probability measures  $\mu, \nu$  some common space  $\mathcal{X}$  that can be expressed as

$$\text{IPM}_{\mathcal{F}}(\mu, \nu) = \sup_{f \in \mathcal{F}} \left| \int_{\mathcal{X}} f d\mu - \int_{\mathcal{X}} f d\nu \right| \quad (1)$$

where  $\mathcal{F}$  is a family of real-valued bounded measurable functions on  $\mathcal{X}$ . For specific choices of  $\mathcal{F}$  the Dudley metric, Total variation distance, Kolmogorov distance, maximum mean discrepancy, and Wasserstein distance can all be expressed as IPMs.

IPMs are often useful when we only have samples  $\hat{\mu} = \frac{1}{n} \sum_{i=1}^n \delta_{x_i}$ ,  $\hat{\nu} = \frac{1}{m} \sum_{j=1}^m \delta_{y_j}$  drawn from probability measures  $\mu, \nu$  [62]. In this case it is possible to directly estimate IPMs, unlike for the class of  $\phi$ -divergences which either do not converge or are  $+\infty$ . The Wasserstein metric is of particular interest as it has an interpretable primal formulation as the transport of mass between distributions.

#### 4.5.2 The Wasserstein Metric as a Norm

Let  $\mu, \nu$  be two probability distributions on a measurable space  $\mathcal{X}$  with metric  $d$ , let  $\Pi(\mu, \nu)$  be the set of joint probability distributions  $\pi$  on the space  $\mathcal{X}^2$  where for any subset  $\omega \subset \mathcal{X}$ ,  $\pi(\omega \times \mathcal{X}) = \mu(\omega)$  and  $\pi(\mathcal{X} \times \omega) = \nu(\omega)$ . The  $\alpha$ -Wasserstein distance is defined as:

$$W_d^\alpha(\mu, \nu) = \left( \inf_{\pi \in \Pi(\mu, \nu)} \int_{\mathcal{X}^2} d(x, y)^\alpha \pi(dx, dy) \right)^{1/\alpha}. \quad (2)$$

The *Kantorovich–Rubinstein dual* for the Wasserstein distance on arbitrary measures is

$$\sup_{(f, g) \in \mathcal{C}(\mathcal{X})^2} \int_{\mathcal{X}} f(x) d\mu(x) + \int_{\mathcal{X}} g(y) d\nu(y) \quad (3)$$

subject to  $f(x) + g(y) \leq d(x, y)^\alpha$  for all  $(x, y) \in \mathcal{X}^2$ . Most work applying the Wasserstein distance focuses on  $\alpha = 2$  [63] or more general convex costs with  $\alpha > 1$  [64], due to the provable regularity of the transport map. We instead focus on the case where  $0 < \alpha \leq 1$ . Here the transportation map loses regularity but admits a simplification of the dual as when  $0 < \alpha \leq 1$ , it can be shown that Eq. 3 achieves optimality when  $g = -f$  [65, Prop. 6.1] and so simplifies to:

$$W_d^\alpha = \sup_f \left\{ \int_{\mathcal{X}} f(x) (d\mu(x) - d\nu(x)) : \mathcal{H}_d^\alpha(f) \leq 1 \right\} \quad (4)$$

where

$$\mathcal{H}_d^\alpha(f) := \sup_{(x, y) \in \mathcal{X}^2} \left\{ \frac{|f(x) - f(y)|}{d(x, y)^\alpha} : x \neq y \right\}. \quad (5)$$



430 When  $0 < \alpha \leq 1$ , Eq. 4 shows that  $W_d^\alpha$  is the dual of the  $\alpha$ -Hölder functions  $\{f : \mathcal{H}_\alpha(f) \leq 1\}$  and is a  
 431 norm, namely

$$W_d^\alpha(\mu, \nu) = \|\mu - \nu\|_{W_d^\alpha}, \quad (6)$$

432 and is valid for any measures  $\mu, \nu$  such that  $\int_{\mathcal{X}} \mu = \int_{\mathcal{X}} \nu$ . Of particular interest is that  $W_d^\alpha$  is still a norm  
 433 even for non-positive measures. This generalization to non-positive measures will form the basis for our  
 434 Trellis metric between datasets and is known as the *Kantorovich–Rubinstein norm* [66] when applied to  
 435 differences of non-positive measures.

436 **Definition 1** ([66]). *The Kantorovich–Rubinstein (KR) distance between measures  $\mu, \nu$  such that  $\int_{\mathcal{X}} \mu =$   
 437  $\int_{\mathcal{X}} \nu$  with respect to ground distance  $d$  as*

$$\text{KR}_d^\alpha(\mu, \nu) := \sup_f \left\{ \int_{\mathcal{X}} f(x)(d\mu(x) - d\nu(x)) : \mathcal{H}_d^\alpha(f) \leq 1 \right\} = \|\mu - \nu\|_{\text{KR}_d^\alpha}. \quad (7)$$

438 For simplicity we will drop the  $\alpha$  term and assume  $\alpha = 1$ , but all statements apply to  $0 < \alpha \leq 1$  unless  
 439 otherwise specified. Trellis can be thought of as an efficient implementation of the KR norm over a tree  
 440 ground distance.

### 441 4.5.3 The Wasserstein Distance with Tree Ground Distance

442 Consider discrete distributions  $\mu = \sum_{i=1}^n \mu_i \delta_i$  and  $\nu = \sum_{i=1}^n \nu_i \delta_i$  where  $\delta$  is the dirac function in  $\mathbb{R}^d$   
 443 and  $\sum_{i=1}^n \mu_i - \nu_i = 0$ . Then for general costs, the Wasserstein distances between  $\mu$  and  $\nu$  can be computed  
 444 exactly in  $\tilde{O}(n^3)$  using the Hungarian algorithm [34], and approximated using a slightly modified entropy  
 445 regularized problem in  $\tilde{O}(n^2)$  with the Sinkhorn algorithm [35].

446 However, for some classes of the ground distance, there exist more efficient algorithms (See Table 1). For  
 447 example, if  $d$  is the Euclidean distance in  $\mathbb{R}$ , then the Wasserstein distance can be computed in  $O(n \log n)$   
 448 time and is equivalent to sorting [65, 67]. This special case is exploited in sliced-Wasserstein metrics [68, 69]  
 449 to compute approximate Wasserstein distances in higher dimensions.

450 Another more general class of ground distances where there exist efficient algorithms is the class of tree  
 451 metrics. Let  $\mathcal{T}$  be a rooted tree with non-negative edge lengths, and let  $d_{\mathcal{T}}$  be a *tree metric* on  $\mathcal{T}$ . Then  
 452 for two measures  $\mu, \nu$  over  $\mathcal{T}$ , the Wasserstein distance with respect to  $d_{\mathcal{T}}$ ,  $W_{d_{\mathcal{T}}}(\mu, \nu)$ , can be computed in  
 453  $O(n)$  time by exploiting the fact that there is a single path between any pair of masses [32, 70, 71]. In this  
 454 case the 1-Wasserstein distance, also known as the Earth Mover’s Distance (EMD) can be expressed as

$$W_{d_{\mathcal{T}}} = \sum_{x \in \mathcal{T}} w_x |\mu(\Gamma(x)) - \nu(\Gamma(x))| \quad (8)$$

455 where  $w_x$  is the weight / distance to the parent node of  $x$  and  $\Gamma(x)$  represents the set of nodes in the subtree  
 456 of  $x$ . Let  $P(x, y)$  be the unique path between  $x$  and  $y$ , then  $\Gamma(x) = \{y \in \mathcal{T} \mid x \in P(r, y)\}$ . This alternative  
 457 formulation can be embedded in  $l_1$ :

$$W_{d_{\mathcal{T}}} = \|v(\mu) - v(\nu)\|_1 \quad (9)$$

458 where  $v : \mu(\mathcal{T}) \rightarrow \mathbb{R}^n$  is a function such that  $v(\mu)_x = w_x \mu(\Gamma(x))$ .

459 Approximating the Euclidean distance with a tree distance can be done probabilistically with  $O(d \log \Delta)$   
 460 distortion in expectation where  $\Delta$  is a resolution parameter [72]. Following the result of Charikar [73], this  
 461 implies that the 1-Wasserstein distance with tree ground distance has the same order distortion. One simple  
 462 tree construction that achieves this distortion is known as “Quadtree”, where each node has four children in  
 463  $\mathbb{R}^2$  and  $2^d$  children in  $\mathbb{R}^d$  [32]. We introduce a new tree construction based on  $k$ -means clustering, which  
 464 we show is a generalization of the Quadtree construction but can be applied to higher dimensions.

---

**Algorithm 2:**  $\text{Trellis}(X, \boldsymbol{\mu}, k, l, \mathcal{T}_m, \mathbf{c})$ 

---

**Input:**  $n \times f$  data matrix  $X$ ,  $n \times m$  distributions  $\boldsymbol{\mu}$ , # of clusters  $k$ , and # of levels  $l$ , manual tree  $\mathcal{T}_m$ , and (optional) control mapping  $\mathbf{c}$  specifying control distribution set for each distribution.

**Output:**  $m \times |\mathcal{T}|$  distribution embeddings  $\mathbf{v}$

$\mathcal{T} \leftarrow \text{BuildTree}(X, k, l, \mathcal{T}_m)$

**for** Node  $\mathcal{T}_i$  with parent edge weight  $w_i$  in  $\mathcal{T}$  **do**

$\mathbf{v}[:, i] \leftarrow w_i \boldsymbol{\mu}(\Gamma(\mathcal{T}_i))$

**end for**

**if**  $\mathbf{c}$  is *null* **then**

**return**  $\mathbf{v}$

**end if**

**for** control distribution set  $\mu_c$  for each distribution  $\mu$  in  $\mathbf{c}$  **do**

$\mathbf{v}[\mu] \leftarrow \mathbf{v}[\mu] - \text{mean}_{\mu_c}(\mathbf{v}[\mu_c])$

**end for**

**return**  $\mathbf{v}$

---

## 4.6 Unpaired and Paired Trellis

We start with a more detailed overview of the Trellis algorithm for comparing the effects of drugs on different experimental conditions. The Trellis algorithm is summarized in Algorithm 2. At a high level Trellis consists of four steps:

1. Construct a hierarchical tree partitioning of the data  $\mathcal{T}$ .
2. Embed each distribution  $\mu^i$  over  $\mathcal{T}$  to a vector  $v(\mu^i)$  such that  $\text{Trellis}(\mu^i, \mu^j) = \|v(\mu^i) - v(\mu^j)\|_1$  to form a Trellis embedding matrix  $\mathbf{E}$ .
3. (optionally) Subtract a control distribution embedding  $v(\mu_c^i)$  from each  $v(\mu^i)$  for paired Trellis embeddings  $\tilde{\mathbf{E}}$ .
4. Compute nearest Trellis neighbor distributions exploiting  $L^1$  geometry using fast-nearest-neighbor graph construction algorithms.

We discuss potential methods of constructing  $\mathcal{T}$  in section 4.6.1, how to embed an empirical distribution to a vector and its equivalence to the Wasserstein distance in section 4.6.2, the effect of subtracting a control distribution embedding in section 4.6.3, and finally how to construct a Trellis-metric nearest neighbor graph for subsequent visualization with a non-linear embedding algorithm such as PHATE [21], UMAP [? ], or  $t$ -SNE [28] in section 4.6.4.

### 4.6.1 Constructing Trees on Single-Cell Mass Cytometry Data

Trellis gives a distance between measures or differences in measures over a tree metric space. Often the data is not associated with an explicit tree metric, but is naturally hierarchical such as in the case of single-cell cytometry data. Previous methods have used manual gating, automatic gating, or a combination of the two to hierarchically cluster single-cell mass cytometry data [74]. These methods build trees, but are missing the ‘metric’ component, which can be encoded as the edge weights between parent and child

---

**Algorithm 3:** BuildTree( $X, k, l, \mathcal{T}_m$ )

---

**Input:**  $n \times f$  data matrix  $X$ , # of clusters  $k$ , # of levels  $l$  and (optional) manual base tree  $\mathcal{T}_m$ .  
**Output:** Weighted hierarchical clustering tree  $\mathcal{T}$ .  
**if**  $l = 0$  **then**  
    **return** *null*  
**end if**  
**if**  $\mathcal{T}_m$  is not *null* **then**  
    **for** leaf node  $n_i$  in  $\mathcal{T}_m$  **do**  
         $\mathcal{T}_i \leftarrow \text{BuildTree}(X[n_i], k, l, \text{null})$   
    **end for**  
    // Where TreeJoin replaces each of the leaves with the respective subtree  
    **return**  $\mathcal{T} \leftarrow \text{TreeJoin}(\mathcal{T}_m, [\mathcal{T}_i])$   
**end if**  
 $\text{labels} \leftarrow \text{Kmeans}(X)$   
**for**  $i = 1$  to  $k$  **do**  
     $\mathcal{T}_i \leftarrow \text{BuildTree}(X[\text{labels} = i], k, l - 1)$   
**end for**  
**return**  $\mathcal{T} \leftarrow [\mathcal{T}_i]_{i=1}^k$

---

487 clusters. We use a simple tree metric where each edge weight for node  $x$  is the Euclidean distance between  
488 the cluster center  $\text{mean}(x)$  and the center of its parent  $\text{mean}(Pa(x))$ .

$$w_x = \|\text{mean}(x) - \text{mean}(Pa(x))\|_2. \quad (10)$$

489 The tree metric between two nodes  $u, v \in \mathcal{T}$  is the sum of the path lengths along the unique path geodesic  
490 between  $u$  and  $v$  in  $\mathcal{T}$  denoted by  $P_{\mathcal{T}}(u, v)$  then

$$d_{\mathcal{T}}(u, v) = \sum_{v \in P_{\mathcal{T}}(u, v)} w_v. \quad (11)$$

491 Trellis applies to any clustering method; we demonstrate the Trellis framework using a simple combina-  
492 tion of manual gating for non-Euclidean features and automatic gating to approximate Euclidean distances  
493 among sub populations. This strategy allows us to leverage manual gating when appropriate due to prior  
494 biological knowledge, or automatic gating using repeated  $k$ -means clustering with no prior on the biologi-  
495 cal splits. This clustering method is of particular interest because in specific settings we can show that the  
496 Trellis metric is topologically equivalent to an Wasserstein distance with Euclidean ground distance in  $\mathbb{R}^d$ .

497 Given a number of clusters at each level  $k$  and a depth  $h$  construct a divisive hierarchical clustering  
498 of the data as described in Algorithm 3. Where Kmeans is the  $k$ -means algorithm with some fixed set of  
499 parameters. Interestingly, with a specific setting of  $k$ -means we show Trellis is topologically equivalent to  
500 the  $\alpha$ -Wasserstein distance with Euclidean ground distance. This is formalized in the following proposition.

501 **Proposition 1.** Let  $k = 2^d$ ,  $\text{max\_iter} = 0$ , data  $X$  be normalized such that  $X \in [-1, 1]^d$  with precision  $\Delta$   
502 and initialize the  $k^{\text{th}}$  cluster at level  $l$  with parent center  $p$  as  $p + 2^{1-l}(\text{Binary}(k) - 1/2)$ . Then there exists  
503 constants  $c, C$  such that

$$c \cdot W_{\|\cdot\|_2}(\mu, \nu) \leq \mathbb{E}[\text{Trellis}(\mu, \nu)] \leq C \log \Delta \cdot W_{\|\cdot\|_2}(\mu, \nu). \quad (12)$$

504 This can be seen by first noting that this initialization is equivalent to a QuadTree construction in the  
505 topological sense. If two points are clustered together in our construction at some level then they are also  
506 clustered together in QuadTree at the equivalent level. In addition, the edge weights are equivalent up to  
507 a constant with the edge weights decaying by  $1/2$  at every level in both constructions. Once these two  
508 properties are verified, then we can leverage existing results on QuadTree constructions from [32] and [73]  
509 to show that the inequalities hold. We also note that there exist results on the approximate nearest neighbors  
510 of this construction in [71].

511 While these parameters for kmeans-clustering work well in low dimensions, the number of clusters  
512 scales exponentially with dimension. In practice we use four levels of four clusters. This expectation holds  
513 over a randomly selected initialization of the zero'th level cluster. In practice, we take the expectation over  
514  $k$ -means initializations, building ten parallel trees with different initializations.

515 Trellis can be applied to any tree metric or ensemble of tree metrics. We have presented a method that  
516 allows for combining manual and automatic gating, as well as an automatic gating method that in expectation  
517 is similar to a Euclidean distance. Many other choices for partitioning CyTof data have been explored in the  
518 automatic gating literature [74–77]. These automatic gating methods are generally used for partitioning the  
519 data not building a tree metric. However, it is simple to convert them into tree metrics by assigning edge  
520 weights based on cluster means. This strategy can be applied to a precomputed hierarchical clustering of the  
521 data with no knowledge of how those clusters were chosen. This allows for adaptation of Trellis to different  
522 systems where either manual or automatic gating is preferred or already computed.

#### 523 4.6.2 Trellis Given a Metric Tree

524 Given a general metric tree  $\mathcal{T}$  of size  $|\mathcal{T}|$ , we first define the embedding function  $v : \mu(\mathcal{T}) \rightarrow \mathbb{R}^{|\mathcal{T}|}$   
525 which takes distributions defined over the tree and embeds them in a vector space where the  $L^1$  between  
526 vectors is equivalent to the Wasserstein distance with tree ground distance. Given edge weights  $w_x$  and  
527 denoting the subtree at node  $x$  as  $\Gamma(x) = \{y \in \mathcal{T} | x \in P(r, y)\}$ , then  $v$  is defined element-wise as

$$v(\mu) = [w_x \mu(\Gamma(x))]_{x \in \mathcal{T}}. \quad (13)$$

528 Intuitively, this can be thought of computing the sum of the mass below each node times the edge weight at  
529 each node. The difference between  $v(\mu)_x - v(\nu)_x$  for a given node  $x \in \mathcal{T}$  can be thought of as the amount  
530 of work needed to move  $\mu$  to  $\nu$ . If this difference is positive, then this means that mass of  $\mu$  is greater in the  
531 subtree  $\Gamma(x)$  than the mass of  $\nu$ . This means that the transport map must move exactly  $\mu(\Gamma(x)) - \nu(\Gamma(x))$   
532 mass upwards from  $x$  at cost  $w_x$ . Adding up these aggregate movements over all nodes gives the total work  
533 needed and is equivalent to the work required by the Wasserstein distance.

534 For our tree construction in Section 4.6.1 with the additional manual tree step, we define the unpaired  
535 Trellis distance (uTrellis) as

$$\text{uTrellis}(\mu, \nu) = \|v(\mu) - v(\nu)\|_1. \quad (14)$$

536 We also define a TreEMD distance without the manual tree construction, considering only the  $k$ -means  
537 construction. TreEMD is similar to previous Tree-based Wasserstein distance constructions for high dimen-  
538 sions [70, 71].

539 These two unpaired distances are comparable to existing methods for computing the Wasserstein dis-  
540 tance between distributions. We discuss related methods for computing or approximating the Wasserstein  
541 distance in Section 4.6.5. However, these distances do not take into account control, treatment, batch, and  
542 replicate information. Given information on which samples were taken under similar conditions, we are able  
543 to improve the distances with *Paired Trellis*.

### 544 4.6.3 Paired Trellis

545 To examine the effects of a drug across many conditions it is useful to measure the differences of the  
546 treated condition relative to a matched control.

For each sample  $\mu$  and  $\nu$ , let the associated control distributions be  $\mu_c$  and  $\nu_c$  respectively, and  $v$  be defined as above. Then we define the Paired Trellis metric between changes in distributions as:

$$\text{pTrellis}(\mu, \nu) := \|v(\mu) - v(\mu_c) - v(\nu) - v(\nu_c)\|_1.$$

547 Intuitively, the Paired Trellis distance measures the difference in the change in density between treated  
548 conditions from their respective controls. This allows us to control for unmeasured confounders that are  
549 implicit in the treated cell population  $\mu$  and  $\nu$  respectively.

550 **Proposition 2.** For two distributions  $\mu, \nu$  with their respective controls  $\mu_c, \nu_c$ , the Paired Trellis is equivalent  
551 to a Kantorovich-Rubenstein distance with tree ground distance as in Eq. 8

$$\text{pTrellis}(\mu, \nu) = KR_{d_{\mathcal{T}}}(\mu - \mu_c, \nu - \nu_c). \quad (15)$$

552 *Proof.* The equivalence of paired Trellis to a Kantorovich-Rubenstein distance can be verified through al-  
553 gebraic manipulation following [78]. We start with the definition of the Kantorovich-Rubenstein distance  
554 and show that this is equivalent to pTrellis for an arbitrary tree domain  $\mathcal{T}$  with ground distance  $d_{\mathcal{T}}$ . Denote  
555 the family of Hölder functions under  $d_{\mathcal{T}}$  as  $\mathcal{F} = \{f : \mathcal{H}_{d_{\mathcal{T}}}^{\alpha}(f) \leq 1 \ \& \ f(r) = 0\}$  and let  $\lambda$  be the (unique)  
556 length measure on  $\mathcal{T}$  such that  $d_{\mathcal{T}}(x, y) = \lambda(P(x, y))$ . Then there exists a unique function  $g : \mathcal{T} \rightarrow [-1, 1]$   
557 such that  $f(x) = \int_{P(r,x)} g(z) \lambda(dz) = \int_{\mathcal{T}} \mathbf{1}_{z \in P(r,x)} g(z) \lambda(dz)$ .

$$\int_{\mathcal{T}} f(x) d\mu(x) = \int_{\mathcal{T}} \int_{\mathcal{T}} \mathbf{1}_{z \in P(r,x)} g(z) \lambda(dz) d\mu(x) = \int_{\mathcal{T}} g(z) \mu(\Gamma(z)) \lambda(dz). \quad (16)$$

558 For the optimal witness function  $f^*$ , we have

$$g(z) = \begin{cases} 1 & \text{if } \mu(\Gamma(z)) > \nu(\Gamma(z)) \\ -1 & \text{else} \end{cases}. \quad (17)$$

559 Plugging this equivalence into Eq. 7 we have

$$KR_{d_{\mathcal{T}}}(\mu, \nu) = \sup_f \left\{ \int_{\mathcal{T}} f(x) (d\mu(x) - d\nu(x)) : \mathcal{H}_{d_{\mathcal{T}}}^{\alpha}(f) \leq 1 \right\} = \int_{\mathcal{T}} |\mu(\Gamma(z)) - \nu(\Gamma(z))| \lambda(dz). \quad (18)$$

560 Therefore, for two measures  $a, b$  over  $\mathcal{T}$  such that  $\int_{\mathcal{T}} a(x) dx = \int_{\mathcal{T}} b(x) dx = c$  we have that  $a(\Gamma(r)) =$   
561  $b(\Gamma(r)) = c$  and for  $v : \mathcal{T} \rightarrow \mathbb{R}^+$  as defined in Eq. 13 we have

$$KR_{d_{\mathcal{T}}}(a, b) = \sum_{x \in \mathcal{T}} w_x |a(\Gamma(x)) - b(\Gamma(x))| = \|v(a) - v(b)\|_1. \quad (19)$$

562 substituting  $a = \mu - \mu_c$  and  $b = \nu - \nu_c$  yields the proposition since  $\int_{\mathcal{T}} a = \int_{\mathcal{T}} b = 0$  for any distributions  
563  $\mu, \mu_c, \nu$ , and  $\nu_c$ .  $\square$

564 We ablate both the pairing and manual tree construction steps in Figure S1. A paired Trellis embedding  
565 better separates the effects of increased drug concentration as compared to TreEMD (Figure S1c) and an  
566 unpaired Trellis embedding according to a  $k$ -NN classifier trained with 10-fold cross validation, while also  
567 being less sensitive to batch effects by the same metric (Figure S1b).

#### 568 4.6.4 Nearest Trellis Neighbors

569 Fast nearest neighbor calculation is useful in graph-based methods which use the  $k$ -nearest neighbor  
 570 graph for down stream tasks such as clustering [79], classification [71], or visualization [20?, 21]. For  
 571 nearest neighbors in normed spaces such as the  $L^2$  norm, the geometry of the space can be utilized for fast  
 572 exact or approximate nearest neighbor calculation in time scaling logarithmically with the number of points.  
 573 For more general distances between objects, these algorithms may not apply.

574 For instance, to compute the  $k$ -nearest neighbor distributions in terms of the Wasserstein distance for  $m$   
 575 distributions, there is no faster algorithm than computing the Wasserstein distance to all other distributions  
 576 then computing the  $k$  closest ones in  $O(m)$  time. However, the Unpaired and Paired Trellis versions of  
 577 the Wasserstein distance for finite data can be expressed as norms in a finite dimensional space, this allows  
 578 us to apply fast nearest neighbor algorithms which exploit the induced geometry between distributions. In  
 579 this case, to find nearest neighbor distributions we can apply tree-based algorithms such as KD-Trees, or  
 580 Ball-Trees as used in PHATE [21] and scikit-learn [80], locality sensitive hashing in  $O(T \log m)$  time for  $m$   
 distributions on trees of size  $T$ .

**Table 1:** Comparison of Earth Mover’s Distance computation methods separated into super-linear (top), and log-linear methods (bottom) based on time-complexity of computing  $k$ -Wasserstein-nearest-neighbors. Assumes a dataset of  $m$  distributions over  $n$  points with (optionally) a tree of size  $|T| = O(n)$ .

| Method                  | Exact | KR-control | Ground cost       | knn-Time             |
|-------------------------|-------|------------|-------------------|----------------------|
| Exact EMD [34]          | Yes   | No         | Any               | $O(m^2n^3)$          |
| Sinkhorn EMD [35]       | No    | No         | Any               | $O(m^2n^2)$          |
| PhEMD [22]              | No    | No         | $d_{\mathcal{M}}$ | $O(m^2T^3 + n^3)$    |
| Mean                    | No    | Yes        | Any               | $\tilde{O}(kmn)$     |
| Diffusion EMD [23]      | No    | Yes        | $d_{\mathcal{M}}$ | $\tilde{O}(kmn)$     |
| Trellis / TreEMD (ours) | Yes   | Yes        | $d_{\mathcal{T}}$ | $\tilde{O}(kmT + n)$ |

581

#### 582 4.6.5 Related Work and Time Complexity

583 There are many methods for computing or approximating the Wasserstein distance. In Table 1 we  
 584 present methods for computing the nearest neighbor distributions according to the Wasserstein distance  
 585 split into two groups. Here we consider the time it takes for the method to compute the  $k$ -Wasserstein-  
 586 nearest-neighbors on a dataset with  $m$  distributions over  $n$  points with access to a precomputed tree over  
 587 the data of size  $|T| = O(n)$ . The first three methods are widely used, but do not scale well to large  
 588 datasets with a large number of distributions or a large number of points. For the first three methods, the  
 589 Hungarian algorithm [34], the Sinkhorn algorithm [35], and PhEMD [22], to find the  $k$ -nearest-neighbors  
 590 for a distribution it is necessary to compute the distance to all  $m$  other distributions. This implies that they  
 591 scale poorly with the number of distributions as illustrated in Figure S2b. PhEMD saves significant time by  
 592 only computing the distances between a small set of clusters, however, eventually this is dominated by an  
 593 increasing number of distributions.

594 Trellis and TreEMD scale log linearly in the number of points, distributions, and the size of the precom-  
 595 puted tree  $\mathcal{T}$ . Constructing the tree partitioning for Trellis takes  $\tilde{O}(n)$  time. Embedding the distributions  
 596 takes  $O(mT)$  time. Subtracting the control distribution embedding for paired Trellis takes  $O(T)$  time. fi-

597 nally, computing the  $k$ -nearest neighbors of the Trellis distance takes  $\tilde{O}(kmT)$  time. In total both unpaired  
598 and paired Trellis take  $\tilde{O}(kmT + n)$  time to compute the  $k$  nearest neighbor distributions.

599 When  $T \ll n$  as in our case, we can see substantial increases in speed in line with simply taking the  
600 Euclidean distance between means of clusters. As  $T$  achieves its upper bound of  $2n - 1$ , Trellis has the  
601 same complexity as computing the nearest distribution means and of DiffusionEMD [23].

## 602 **5 Data Availability**

603 All mass cytometry files are available on Cytobank at: <https://community.cytobank.org/cytobank/projects/1461> Compiled TOBis mass cytometry PDO-CAF dataframe is available at: <https://data.mendeley.com/datasets/hc8gxwks3p> (with a key in Table S2).

## 606 **6 Code Availability**

607 Trellis code is available at: <https://github.com/KrishnaswamyLab/Trellis>. Code to reproduce all PHATE  
608 embeddings in this paper is available at: <https://github.com/TAPE-Lab/Ramos-et-al-Trellis>.

## 609 **7 Acknowledgments**

610 We are extremely grateful to M. Garnett, H. Francies and the Cell Model Network UK for sharing  
611 CRC PDOs and O. De Wever for providing CRC CAFs. We thank Y. Guo, K. Boustani, and G. Morrow  
612 from the UCL CI Flow-Core for mass cytometry support. This work was supported by Cancer Research  
613 UK (C60693 / A23783), the Cancer Research UK City of London Centre (C7893 / A26233), the UCLH  
614 Biomedical Research Centre (BRC422), the Rosetrees Trust (M872 / A2292), the Yale-UCL Collaborative  
615 Student Exchange Programme, the NIH (R01GM135929 / R01GM130847), the NSF Career (2047856), the  
616 Chan-Zuckerberg Initiative (CZF2019-182702 / CZF2019-002440), and the Sloan Fellowship (FG-2021-  
617 15883).

## 618 **8 Author Contributions**

619 M.R.Z. designed the study, performed all PDO-CAF TOBis mass cytometry experiments, analyzed the  
620 data, and wrote the paper. A.T. conceived and developed Trellis, analyzed the data, and wrote the paper. J.S.  
621 conjugated mass cytometry antibodies and developed TOBis barcodes. P.V., C.N., and X.Q. provided PDO  
622 and CAF support. F.C.R. analyzed the data. D.H. provided chemotherapies and oversaw the project. S.K.  
623 conceived and oversaw Trellis. C.J.T. designed the study, analyzed the data, and wrote the paper.

## 624 **9 Competing Interests**

625 S.K. is on the scientific advisory board of KovaDx and AI Therapeutics.

## 626 References

- 627 [1] C. J. Tape. The heterocellular emergence of colorectal cancer. *Trends Cancer*, 3(2):79–88, 2017. 2
- 628 [2] Y. Xi and P. Xu. Global colorectal cancer burden in 2020 and projections to 2040. *Transl Oncol*, 14  
629 (10):101174, 2021. 2
- 630 [3] W. M. Grady and J. M. Carethers. Genomic and epigenetic instability in colorectal cancer pathogenesis.  
631 *Gastroenterology*, 135(4):1079–99, 2008. 2
- 632 [4] E. Sahai, I. Astsaturov, E. Cukierman, D. G. DeNardo, M. Egeblad, R. M. Evans, D. Fearon, F. R.  
633 Greten, S. R. Hingorani, T. Hunter, R. O. Hynes, R. K. Jain, T. Janowitz, C. Jorgensen, A. C. Kim-  
634 melman, M. G. Kolonin, R. G. Maki, R. S. Powers, E. Pure, D. C. Ramirez, R. Scherz-Shouval, M. H.  
635 Sherman, S. Stewart, T. D. Tlsty, D. A. Tuveson, F. M. Watt, V. Weaver, A. T. Weeraratna, and Z. Werb.  
636 A framework for advancing our understanding of cancer-associated fibroblasts. *Nat Rev Cancer*, 20  
637 (3):174–186, 2020. 2, 9
- 638 [5] A. Calon, E. Lonardo, A. Berenguer-Llargo, E. Espinet, X. Hernando-Momblona, M. Iglesias,  
639 M. Sevillano, S. Palomo-Ponce, D. V. Tauriello, D. Byrom, C. Cortina, C. Morral, C. Barcelo, S. Tosi,  
640 A. Riera, C. S. Attolini, D. Rossell, E. Sancho, and E. Batlle. Stromal gene expression defines poor-  
641 prognosis subtypes in colorectal cancer. *Nat Genet*, 47(4):320–9, 2015. 2
- 642 [6] A. Woolston, K. Khan, G. Spain, L. J. Barber, B. Griffiths, R. Gonzalez-Exposito, L. Hornsteiner,  
643 M. Punta, Y. Patil, A. Newey, S. Mansukhani, M. N. Davies, A. Furness, F. Sclafani, C. Peckitt,  
644 M. Jimenez, K. Kouvelakis, R. Ranftl, R. Begum, I. Rana, J. Thomas, A. Bryant, S. Quezada,  
645 A. Wotherspoon, N. Khan, N. Fotiadis, T. Marafioti, T. Powles, S. Lise, F. Calvo, S. Guettler, K. von  
646 Loga, S. Rao, D. Watkins, N. Starling, I. Chau, A. Sadanandam, D. Cunningham, and M. Gerlinger.  
647 Genomic and transcriptomic determinants of therapy resistance and immune landscape evolution dur-  
648 ing anti-egfr treatment in colorectal cancer. *Cancer Cell*, 36(1):35–50 e9, 2019. 2
- 649 [7] A. M. Nicolas, M. Pesic, E. Engel, P. K. Ziegler, M. Diefenhardt, K. B. Kennel, F. Buettner, C. Conche,  
650 V. Petrocelli, E. Elwakeel, A. Weigert, A. Zinoveva, M. Fleischmann, B. Haupl, C. Karakutuk,  
651 H. Bohnenberger, M. H. Mosa, L. Kaderali, J. Gaedcke, M. Ghadimi, F. Rodel, M. C. Arkan, T. Oel-  
652 lerich, C. Rodel, E. Fokas, and F. R. Greten. Inflammatory fibroblasts mediate resistance to neoadjuvant  
653 therapy in rectal cancer. *Cancer Cell*, 40(2):168–184 e13, 2022. 2
- 654 [8] H. Clevers. Modeling development and disease with organoids. *Cell*, 165(7):1586–1597, 2016. 2, 12
- 655 [9] G. Vlachogiannis, S. Hedayat, A. Vatsiou, Y. Jamin, J. Fernandez-Mateos, K. Khan, A. Lampis, K. Ea-  
656 son, I. Huntingford, R. Burke, M. Rata, D. M. Koh, N. Tunariu, D. Collins, S. Hulkki-Wilson, C. Rag-  
657 ulan, I. Spiteri, S. Y. Moorcraft, I. Chau, S. Rao, D. Watkins, N. Fotiadis, M. Bali, M. Darvish-  
658 Damavandi, H. Lote, Z. Eltahir, E. C. Smyth, R. Begum, P. A. Clarke, J. C. Hahne, M. Dowsett,  
659 J. de Bono, P. Workman, A. Sadanandam, M. Fassan, O. J. Sansom, S. Eccles, N. Starling, C. Bra-  
660 conni, A. Sottoriva, S. P. Robinson, D. Cunningham, and N. Valeri. Patient-derived organoids model  
661 treatment response of metastatic gastrointestinal cancers. *Science*, 359(6378):920–926, 2018. 2
- 662 [10] A. Letai, P. Bholra, and A. L. Welm. Functional precision oncology: Testing tumors with drugs to  
663 identify vulnerabilities and novel combinations. *Cancer Cell*, 40(1):26–35, 2017. 2, 6



- 664 [11] K. Yuki, N. Cheng, M. Nakano, and C. J. Kuo. Organoid models of tumor immunology. *Trends*  
665 *Immunol*, 41(8):652–664, 2020. 2
- 666 [12] M. van de Wetering, H. E. Francies, J. M. Francis, G. Bounova, F. Iorio, A. Pronk, W. van Houdt, J. van  
667 Gorp, A. Taylor-Weiner, L. Kester, A. McLaren-Douglas, J. Blokker, S. Jaksani, S. Bartfeld, R. Vol-  
668 ckman, P. van Sluis, V. S. Li, S. Seepo, C. Sekhar Pdamallu, K. Cibulskis, S. L. Carter, A. McKenna,  
669 M. S. Lawrence, L. Lichtenstein, C. Stewart, J. Koster, R. Versteeg, A. van Oudenaarden, J. Saez-  
670 Rodriguez, R. G. Vries, G. Getz, L. Wessels, M. R. Stratton, U. McDermott, M. Meyerson, M. J.  
671 Garnett, and H. Clevers. Prospective derivation of a living organoid biobank of colorectal cancer  
672 patients. *Cell*, 161(4):933–45, 2015. 2, 14
- 673 [13] X. Qin and C. J. Tape. Deciphering organoids: High-dimensional analysis of biomimetic cultures.  
674 *Trends Biotechnol*, 39(8):774–787, 2021. 2, 11, 12, 13
- 675 [14] X. Qin, J. Sufi, P. Vlckova, P. Kyriakidou, S. E. Acton, V. S. W. Li, M. Nitz, and C. J. Tape. Cell-type-  
676 specific signaling networks in heterocellular organoids. *Nat Methods*, 17(3):335–342, 2020. 2
- 677 [15] J. Sufi, X. Qin, F. C. Rodriguez, Y. J. Bu, P. Vlckova, M. R. Zapatero, M. Nitz, and C. J. Tape.  
678 Multiplexed single-cell analysis of organoid signaling networks. *Nat Protoc*, 16(10):4897–4918, 2021.  
679 2, 15
- 680 [16] E. De Vlieghere, F. Gremontprez, L. Verset, L. Marien, C. J. Jones, B. De Craene, G. Berx,  
681 B. Descamps, C. Vanhove, J. P. Remon, W. Ceelen, P. Demetter, M. Bracke, B. G. De Geest, and  
682 O. De Wever. Tumor-environment biomimetics delay peritoneal metastasis formation by deceiving  
683 and redirecting disseminated cancer cells. *Biomaterials*, 54:148–57, 2015. 2, 14
- 684 [17] E. De Jaeghere, E. De Vlieghere, J. Van Hoorick, S. Van Vlierberghe, G. Wagemans, L. Pieters,  
685 E. Melsens, M. Praet, J. Van Dorpe, M. N. Boone, R. Ghobeira, N. De Geyter, M. Bracke, C. Vanhove,  
686 S. Neyt, G. Berx, B. G. De Geest, P. Dubruel, H. Declercq, W. Ceelen, and O. De Wever. Heterocellu-  
687 lar 3d scaffolds as biomimetic to recapitulate the tumor microenvironment of peritoneal metastases in  
688 vitro and in vivo. *Biomaterials*, 158:95–105, 2018. 2, 14
- 689 [18] M. R. Middleton, E. Dean, T. R. J. Evans, G. I. Shapiro, J. Pollard, B. S. Hendriks, M. Falk, I. Diaz-  
690 Padilla, and R. Plummer. Phase 1 study of the atr inhibitor berzosertib (formerly m6620, vx-970)  
691 combined with gemcitabine +/- cisplatin in patients with advanced solid tumours. *Br J Cancer*, 125  
692 (4):510–519, 2021. 2, 7
- 693 [19] E. R. Zunder, R. Finck, G. K. Behbehani, A. D. Amir el, S. Krishnaswamy, V. D. Gonzalez, C. G.  
694 Lorang, Z. Bjornson, M. H. Spitzer, B. Bodenmiller, W. J. Fantl, D. Pe'er, and G. P. Nolan. Palladium-  
695 based mass tag cell barcoding with a doublet-filtering scheme and single-cell deconvolution algorithm.  
696 *Nat Protoc*, 10(2):316–33, 2015. 2, 15
- 697 [20] Kevin R. Moon, Jay S. Stanley, Daniel Burkhardt, David van Dijk, Guy Wolf, and Smita Krish-  
698 naswamy. Manifold learning-based methods for analyzing single-cell RNA-sequencing data. *Current*  
699 *Opinion in Systems Biology*, 7:36–46, February 2018. ISSN 24523100. doi: 10.1016/j.coisb.2017.12.  
700 008. 3, 22
- 701 [21] Kevin R. Moon, David van Dijk, Zheng Wang, Scott Gigante, Daniel B. Burkhardt, William S. Chen,  
702 Kristina Yim, Antonia van den Elzen, Matthew J. Hirn, Ronald R. Coifman, Natalia B. Ivanova, Guy

- 703 Wolf, and Smita Krishnaswamy. Visualizing structure and transitions in high-dimensional biological  
704 data. *Nat Biotechnol*, 37(12):1482–1492, 2019. 4, 18, 22
- 705 [22] William S. Chen, Nevena Zivanovic, David van Dijk, Guy Wolf, Bernd Bodenmiller, and Smita Kr-  
706 ishnaswamy. Uncovering axes of variation among single-cell cancer specimens. *Nat Methods*, 17(3):  
707 302–310, March 2020. ISSN 1548-7091, 1548-7105. doi: 10.1038/s41592-019-0689-z. 3, 15, 22
- 708 [23] Alexander Tong, Guillaume Hugué, Amine Natic, Kincaid MacDonald, Manik Kuchroo, Ronald Coif-  
709 man, Guy Wolf, and Smita Krishnaswamy. Diffusion Earth Mover’s Distance and Distribution Embed-  
710 dings. In *Proceedings of the 38th International Conference on Machine Learning*, volume 139, pages  
711 10336–10346. PMLR, 2021. 3, 22, 23
- 712 [24] Alexander Tong, Guillaume Hugué, Dennis Shung, Amine Natic, Manik Kuchroo, Guillaume Lajoie,  
713 Guy Wolf, and Smita Krishnaswamy. Embedding Signals on Knowledge Graphs with Unbalanced  
714 Diffusion Earth Mover’s Distance. In *ICASSP*, 2022. 3, 15
- 715 [25] Aaron T L Lun, Arianne C Richard, and John C Marioni. Testing for differential abundance in mass  
716 cytometry data. *Nat Methods*, 14(7):707–709, July 2017. ISSN 1548-7091, 1548-7105. doi: 10.1038/  
717 nmeth.4295. 3
- 718 [26] Chamith Y. Fonseka, Deepak A. Rao, Nikola C. Teslovich, Ilya Korsunsky, Susan K. Hannes, Kamil  
719 Slowikowski, Michael F. Gurish, Laura T. Donlin, James A. Lederer, Michael E. Weinblatt, Elena M.  
720 Massarotti, Jonathan S. Coblyn, Simon M. Helfgott, Derrick J. Todd, Vivian P. Bykerk, Elizabeth W.  
721 Karlson, Joerg Ermann, Yvonne C. Lee, Michael B. Brenner, and Soumya Raychaudhuri. Mixed-  
722 effects association of single cells identifies an expanded effector CD4+ T cell subset in rheumatoid  
723 arthritis. *Science Translational Medicine*, 10(463):eaaq0305, October 2018. ISSN 1946-6242. doi:  
724 10.1126/scitranslmed.aaq0305.
- 725 [27] Belinda Phipson, Choon Boon Sim, Enzo R Porrello, Alex W Hewitt, Joseph Powell, and Alicia Osh-  
726 lack. propeller: testing for differences in cell type proportions in single cell data. *Bioinformatics*,  
727 38(20):4720–4726, October 2022. ISSN 1367-4803. doi: 10.1093/bioinformatics/btac582. URL  
728 <https://doi.org/10.1093/bioinformatics/btac582>. 3
- 729 [28] Laurens van der Maaten and Geoffrey E Hinton. Visualizing Data using t-SNE. *Journal of Machine*  
730 *Learning Research*, 2008. 4, 18
- 731 [29] ANNOY library. <https://github.com/spotify/annoy>. Accessed: 2017-08-01. 4
- 732 [30] E. Becht, L. McInnes, J. Healy, C. A. Dutertre, I. W. H. Kwok, L. G. Ng, F. Ginhoux, and E. W. Newell.  
733 Dimensionality reduction for visualizing single-cell data using umap. *Nat Biotechnol*, 2018. 4
- 734 [31] F. Alexander Wolf, Philipp Angerer, and Fabian J. Theis. SCANPY: Large-scale single-cell gene  
735 expression data analysis. *Genome Biol*, 19(1):15, December 2018. ISSN 1474-760X. doi: 10.1186/s1  
736 3059-017-1382-0. 4
- 737 [32] Piotr Indyk and Nitin Thaper. Fast image retrieval via embeddings. In *3rd International Workshop on*  
738 *Statistical and Computational Theories of Vision*, 2003. 4, 17, 20

- 739 [33] Mayur Datar, Nicole Immorlica, Piotr Indyk, and Vahab S. Mirrokni. Locality-sensitive hashing  
740 scheme based on p-stable distributions. In *Proceedings of the Twentieth Annual Symposium on Com-*  
741 *putational Geometry - SCG '04*, page 253, Brooklyn, New York, USA, 2004. ACM Press. ISBN  
742 978-1-58113-885-6. doi: 10.1145/997817.997857. 4
- 743 [34] H. W. Kuhn. The Hungarian method for the assignment problem. *Naval Research Logistics*, 2(1-2):  
744 83–97, March 1955. ISSN 00281441, 19319193. doi: 10.1002/nav.3800020109. 4, 17, 22
- 745 [35] Marco Cuturi. Sinkhorn Distances: Lightspeed Computation of Optimal Transport. In *Advances in*  
746 *Neural Information Processing Systems 26*, pages 2292–2300, 2013. 4, 17, 22
- 747 [36] Y. Pommier. Drugging topoisomerases: lessons and challenges. *ACS Chem Biol*, 8(1):82–95, 2013. 5
- 748 [37] D. V. Santi, C. S. McHenry, and H. Sommer. Mechanism of interaction of thymidylate synthetase with  
749 5-fluorodeoxyuridylate. *Biochemistry*, 13(3):471–81, 1974. 5
- 750 [38] P. M. Bruno, Y. Liu, G. Y. Park, J. Murai, C. E. Koch, T. J. Eisen, J. R. Pritchard, Y. Pommier, S. J.  
751 Lippard, and M. T. Hemann. A subset of platinum-containing chemotherapeutic agents kills cells by  
752 inducing ribosome biogenesis stress. *Nat Med*, 23(4):461–471, 2017. 5, 6
- 753 [39] G. K. Behbehani, S. C. Bendall, M. R. Clutter, W. J. Fantl, and G. P. Nolan. Single-cell mass cytometry  
754 adapted to measurements of the cell cycle. *Cytometry A*, 81(7):552–66, 2012. 5
- 755 [40] M. A. Rapsomaniki, X. K. Lun, S. Woerner, M. Laumanns, B. Bodenmiller, and M. R. Martinez.  
756 Cellcycletracer accounts for cell cycle and volume in mass cytometry data. *Nat Commun*, 9(1):632,  
757 2018. 5
- 758 [41] H. Jin, L. Wang, and R. Bernards. Rational combinations of targeted cancer therapies: background,  
759 advances and challenges. *Nat Rev Drug Discov*, 2022. 9
- 760 [42] S. K. Rehman, J. Haynes, E. Collignon, K. R. Brown, Y. Wang, A. M. L. Nixon, J. P. Bruce, J. A. Win-  
761 tersinger, A. Singh Mer, E. B. L. Lo, C. Leung, E. Lima-Fernandes, N. M. Pedley, F. Soares, S. McGib-  
762 bon, H. H. He, A. Pollet, T. J. Pugh, B. Haibe-Kains, Q. Morris, M. Ramalho-Santos, S. Goyal, J. Mof-  
763 fat, and C. A. O’Brien. Colorectal cancer cells enter a diapause-like dtp state to survive chemotherapy.  
764 *Cell*, 184(1):226–242 e21, 2021. 9
- 765 [43] A. Alvarez-Varela, L. Novellasdemunt, F. M. Barriga, X. Hernando-Momblona, A. Canellas-Socias,  
766 S. Cano-Crespo, M. Sevillano, C. Cortina, D. Stork, C. Morral, G. Turon, F. Slebe, L. Jimenez-Gracia,  
767 G. Caratu, P. Jung, G. Stassi, H. Heyn, D. V. F. Tauriello, L. Mateo, S. Tejpar, E. Sancho, C. Stephan-  
768 Otto Attolini, and E. Batlle. Mex3a marks drug-tolerant persister colorectal cancer cells that mediate  
769 relapse after chemotherapy. *Nat Cancer*, 2022. 9
- 770 [44] S. Yui, L. Azzolin, M. Maimets, M. T. Pedersen, R. P. Fordham, S. L. Hansen, H. L. Larsen, J. Guiu,  
771 M. R. P. Alves, C. F. Rundsten, J. V. Johansen, Y. Li, C. D. Madsen, T. Nakamura, M. Watanabe, O. H.  
772 Nielsen, P. J. Schweiger, S. Piccolo, and K. B. Jensen. Yap/taz-dependent reprogramming of colonic  
773 epithelium links ecm remodeling to tissue regeneration. *Cell Stem Cell*, 22(1):35–49 e7, 2018. 9
- 774 [45] V. Veninga and E. E. Voest. Tumor organoids: Opportunities and challenges to guide precision  
775 medicine. *Cancer Cell*, 39(9):1190–1201, 2021. 11, 12

- 776 [46] N. Gavert, Y. Zwang, R. Weiser, O. Greenberg, S. Halperin, O. Jacobi, G. Mallel, O. Sandler, A. J.  
777 Berger, E. Stossel, D. Rotin, A. Grinshpun, I. Kamer, J. Bar, G. Pines, D. Saidian, I. Bar, S. Golan,  
778 E. Rosenbaum, A. Nadu, E. Ben-Ami, R. Weitzen, H. Nechushtan, T. Golan, B. Brenner, A. Nissan,  
779 O. Margalit, D. Hershkovitz, G. Lahat, and R. Straussman. Ex vivo organotypic cultures for syner-  
780 gistic therapy prioritization identify patient-specific responses to combined mek and src inhibition in  
781 colorectal cancer. *Nat Cancer*, 2022. 12
- 782 [47] C. Pauli, B. D. Hopkins, D. Prandi, R. Shaw, T. Fedrizzi, A. Sboner, V. Sailer, M. Augello, L. Puca,  
783 R. Rosati, T. J. McNary, Y. Churakova, C. Cheung, J. Triscott, D. Pisapia, R. Rao, J. M. Mos-  
784 quera, B. Robinson, B. M. Faltas, B. E. Emerling, V. K. Gadi, B. Bernard, O. Elemento, H. Beltran,  
785 F. Demichelis, C. J. Kemp, C. Grandori, L. C. Cantley, and M. A. Rubin. Personalized in vitro and in  
786 vivo cancer models to guide precision medicine. *Cancer Discov*, 7(5):462–477, 2017.
- 787 [48] K. P. Guillen, M. Fujita, A. J. Butterfield, S. D. Scherer, M. H. Bailey, Z. Chu, Y. S. DeRose,  
788 L. Zhao, E. Cortes-Sanchez, C. H. Yang, J. Toner, G. Wang, Y. Qiao, X. Huang, J. A. Greenland,  
789 J. M. Vahrenkamp, D. H. Lum, R. E. Factor, E. W. Nelson, C. B. Matsen, J. M. Poretta, R. Rosenthal,  
790 A. C. Beck, S. S. Buys, C. Vaklavas, J. H. Ward, R. L. Jensen, K. B. Jones, Z. Li, S. Oesterreich, L. E.  
791 Dobrolecki, S. S. Pathi, X. Y. Woo, K. C. Berrett, M. E. Wadsworth, J. H. Chuang, M. T. Lewis, G. T.  
792 Marth, J. Gertz, K. E. Varley, B. E. Welm, and A. L. Welm. A human breast cancer-derived xenograft  
793 and organoid platform for drug discovery and precision oncology. *Nat Cancer*, 3(2):232–250, 2022.  
794 12
- 795 [49] S. Raghavan, P. S. Winter, A. W. Navia, H. L. Williams, A. DenAdel, K. E. Lowder, J. Galvez-Reyes,  
796 R. L. Kalekar, N. Mulugeta, K. S. Kapner, M. S. Raghavan, A. A. Borah, N. Liu, S. A. Vayrynen, A. D.  
797 Costa, R. W. S. Ng, J. Wang, E. K. Hill, D. Y. Ragon, L. K. Brais, A. M. Jaeger, L. F. Spurr, Y. Y. Li,  
798 A. D. Cherniack, M. A. Booker, E. F. Cohen, M. Y. Tolstorukov, I. Wakiro, A. Rotem, B. E. Johnson,  
799 J. M. McFarland, E. T. Sicinska, T. E. Jacks, R. J. Sullivan, G. I. Shapiro, T. E. Clancy, K. Perez, D. A.  
800 Rubinson, K. Ng, J. M. Cleary, L. Crawford, S. R. Manalis, J. A. Nowak, B. M. Wolpin, W. C. Hahn,  
801 A. J. Aguirre, and A. K. Shalek. Microenvironment drives cell state, plasticity, and drug response in  
802 pancreatic cancer. *Cell*, 184(25):6119–6137 e26, 2021. 12
- 803 [50] D. Hanahan. Hallmarks of cancer: New dimensions. *Cancer Discov*, 12(1):31–46, 2022. 12
- 804 [51] D. B. Burkhardt, B. P. San Juan, J. G. Lock, S. Krishnaswamy, and C. L. Chaffer. Mapping phenotypic  
805 plasticity upon the cancer cell state landscape using manifold learning. *Cancer Discov*, pages OF1–  
806 OF13, 2022. 12
- 807 [52] J. M. Chan, S. Zaidi, J. R. Love, J. L. Zhao, M. Setty, K. M. Wadosky, A. Gopalan, Z. N. Choo,  
808 S. Persad, J. Choi, J. LaClair, K. E. Lawrence, O. Chaudhary, T. Xu, I. Masilionis, I. Linkov, S. Wang,  
809 C. Lee, A. Barlas, M. J. Morris, L. Mazutis, R. Chaligne, Y. Chen, D. W. Goodrich, W. R. Karthaus,  
810 D. Pe’er, and C. L. Sawyers. Lineage plasticity in prostate cancer depends on jak/stat inflammatory  
811 signaling. *Science*, page eabn0478, 2022. 12
- 812 [53] J. Househam, T. Heide, G. D. Cresswell, I. Spiteri, C. Kimberley, L. Zapata, C. Lynn, C. James,  
813 M. Mossner, J. Fernandez-Mateos, A. Vinceti, A. M. Baker, C. Gabbutt, A. Berner, M. Schmidt,  
814 B. Chen, E. Lakatos, V. Gunasri, D. Nichol, H. Costa, M. Mitchinson, D. Ramazzotti, B. Werner,  
815 F. Iorio, M. Jansen, G. Caravagna, C. P. Barnes, D. Shibata, J. Bridgewater, M. Rodriguez-Justo,  
816 L. Magnani, A. Sottoriva, and T. A. Graham. Phenotypic plasticity and genetic control in colorectal  
817 cancer evolution. *Nature*, 2022. 12

- 818 [54] H. Tiriach, P. Belleau, D. D. Engle, D. Plenker, A. Deschenes, T. D. D. Somerville, F. E. M. Froeling,  
819 R. A. Burkhart, R. E. Denroche, G. H. Jang, K. Miyabayashi, C. M. Young, H. Patel, M. Ma, J. F.  
820 LaComb, R. L. D. Palmaira, A. A. Javed, J. C. Huynh, M. Johnson, K. Arora, N. Robine, M. Shah,  
821 R. Sanghvi, A. B. Goetz, C. Y. Lowder, L. Martello, E. Driehuis, N. LeComte, G. Askan, C. A.  
822 Iacobuzio-Donahue, H. Clevers, L. D. Wood, R. H. Hruban, E. Thompson, A. J. Aguirre, B. M. Wolpin,  
823 A. Sasson, J. Kim, M. Wu, J. C. Bucobo, P. Allen, D. V. Sejjpal, W. Nealon, J. D. Sullivan, J. M. Winter,  
824 P. A. Gimotty, J. L. Grem, D. J. DiMaio, J. M. Buscaglia, P. M. Grandgenett, J. R. Brody, M. A.  
825 Hollingsworth, G. M. O’Kane, F. Notta, E. Kim, J. M. Crawford, C. Devoe, A. Ocean, C. L. Wolfgang,  
826 K. H. Yu, E. Li, C. R. Vakoc, B. Hubert, S. E. Fischer, J. M. Wilson, R. Moffitt, J. Knox, A. Krasnitz,  
827 S. Gallinger, and D. A. Tuveson. Organoid profiling identifies common responders to chemotherapy  
828 in pancreatic cancer. *Cancer Discov*, 8(9):1112–1129, 2018. 12
- 829 [55] P. East, G. P. Kelly, D. Biswas, M. Marani, D. C. Hancock, T. Creasy, K. Sachsenmeier, C. Swanton,  
830 T. RACERx consortium, J. Downward, and S. de Carne Trecesson. Ras oncogenic activity predicts  
831 response to chemotherapy and outcome in lung adenocarcinoma. *Nat Commun*, 13(1):5632, 2022. 12
- 832 [56] Abel Sousa, Aurelien Dugourd, Danish Memon, Borgthor Petursson, Evangelia Petsalaki, Julio Saez-  
833 Rodriguez, and Pedro Beltrao. Pan-cancer landscape of protein activities identifies drivers of signalling  
834 dysregulation and patient survival. *bioRxiv*, 2021. doi: 10.1101/2021.06.09.447741. 12
- 835 [57] P. Jaaks, E. A. Coker, D. J. Vis, O. Edwards, E. F. Carpenter, S. M. Leto, L. Dwane, F. Sassi, H. Light-  
836 foot, S. Barthorpe, D. van der Meer, W. Yang, A. Beck, T. Mironenko, C. Hall, J. Hall, I. Mali,  
837 L. Richardson, C. Tolley, J. Morris, F. Thomas, E. Lleshi, N. Aben, C. H. Benes, A. Bertotti, L. Tru-  
838 solino, L. Wessels, and M. J. Garnett. Effective drug combinations in breast, colon and pancreatic  
839 cancer cells. *Nature*, 603(7899):166–173, 2022. 12
- 840 [58] Yu Takahashi, Shintaro Sato, Yosuke Kurashima, Tomohisa Yamamoto, Shiho Kurokawa, Yoshikazu  
841 Yuki, Naoki Takemura, Satoshi Uematsu, Chen-Yi Lai, Makoto Otsu, Hiroshi Matsuno, Hideki Osawa,  
842 Tsunekazu Mizushima, Junichi Nishimura, Mikio Hayashi, Takayuki Yamaguchi, and Hiroshi Kiyono.  
843 A Refined Culture System for Human Induced Pluripotent Stem Cell-Derived Intestinal Epithelial  
844 Organoids. *Stem Cell Reports*, 10(1):314–328, January 2018. ISSN 2213-6711. doi: 10.1016/j.stemcr  
845 .2017.11.004. URL <https://www.sciencedirect.com/science/article/pii/S2213671117304903>. 14
- 846 [59] Yuge Ji, Mohammad Lotfollahi, F. Alexander Wolf, and Fabian J. Theis. Machine learning for  
847 perturbational single-cell omics. *Cell Systems*, 12(6):522–537, 2021. ISSN 24054712. doi:  
848 10.1016/j.cels.2021.05.016. 15
- 849 [60] Dongju Shin, Wookjae Lee, Ji Hyun Lee, and Duhee Bang. Multiplexed single-cell RNA-seq via  
850 transient barcoding for simultaneous expression profiling of various drug perturbations. *Sci. Adv.*, 5  
851 (5):eaav2249, May 2019. ISSN 2375-2548. doi: 10.1126/sciadv.aav2249. 15
- 852 [61] Atray Dixit, Oren Parnas, Biyu Li, Jenny Chen, Charles P. Fulco, Livnat Jerby-Aron, Nemanja D.  
853 Marjanovic, Danielle Dionne, Tyler Burks, Raktima Raychowdhury, Britt Adamson, Thomas M. Nor-  
854 man, Eric S. Lander, Jonathan S. Weissman, Nir Friedman, and Aviv Regev. Perturb-Seq: Dissecting  
855 Molecular Circuits with Scalable Single-Cell RNA Profiling of Pooled Genetic Screens. *Cell*, 167(7):  
856 1853–1866.e17, December 2016. ISSN 00928674. doi: 10.1016/j.cell.2016.11.038. 15

- 857 [62] Bharath K. Sriperumbudur, Kenji Fukumizu, Arthur Gretton, Bernhard Schölkopf, and Gert R. G.  
858 Lanckriet. On the empirical estimation of integral probability metrics. *Electron. J. Statist.*, 6(none),  
859 January 2012. ISSN 1935-7524. doi: 10.1214/12-EJS722. 16
- 860 [63] Shibing Chen and Alessio Figalli. Partial W<sub>2</sub>, regularity for optimal transport maps. *Journal of*  
861 *Functional Analysis*, 272(11):4588–4605, June 2017. ISSN 00221236. doi: 10.1016/j.jfa.2017.02.025.  
862 16
- 863 [64] Luis A Caffarelli. The Regularity of Mappings with Convex Potential. *J. Amer. Math. Soc.*, 5(1), 1992.  
864 16
- 865 [65] Gabriel Peyré and Marco Cuturi. *Computational Optimal Transport*. arXiv:1803.00567, 2019. 16, 17
- 866 [66] Leonid G Hanin. Kantorovich-Rubinstein Norm and Its Application in the Theory of Lipschitz Spaces.  
867 *Proc. AMS*, 115(2):345–352, 1992. 17
- 868 [67] Sheida Nabavi, Daniel Schmolze, Mayinuer Maitituoheti, Sadhika Malladi, and Andrew H. Beck.  
869 EMDomics: A robust and powerful method for the identification of genes differentially expressed  
870 between heterogeneous classes. *Bioinformatics*, 32(4):533–541, February 2016. ISSN 1367-4803.  
871 doi: 10.1093/bioinformatics/btv634. 17
- 872 [68] Soheil Kolouri, Yang Zou, and Gustavo K. Rohde. Sliced Wasserstein Kernels for Probability Dis-  
873 tributions. In *2016 IEEE Conference on Computer Vision and Pattern Recognition (CVPR)*, pages  
874 5258–5267, Las Vegas, NV, USA, June 2016. IEEE. ISBN 978-1-4673-8851-1. doi: 10.1109/CVPR  
875 .2016.568. 17
- 876 [69] Soheil Kolouri, Kimia Nadjahi, Umut Simsekli, Roland Badeau, and Gustavo Rohde. Generalized  
877 Sliced Wasserstein Distances. In *Advances in Neural Information Processing Systems 32*, pages 261–  
878 272, 2019. 17
- 879 [70] Tam Le, Makoto Yamada, Kenji Fukumizu, and Marco Cuturi. Tree-Sliced Variants of Wasserstein  
880 Distances. In *Advances in Neural Information Processing Systems 33*, 2019. 17, 20
- 881 [71] Arturs Backurs, Yihe Dong, Piotr Indyk, Ilya Razenshteyn, and Tal Wagner. Scalable Nearest Neighbor  
882 Search for Optimal Transport. *ICML*, 2020. 17, 20, 22
- 883 [72] Yair Bartal. Probabilistic Approximation of Metric Spaces and its Algorithmic Applications. In *In*  
884 *37th Annual Symposium on Foundations of Computer Science*, pages 184–193, 1996. 17
- 885 [73] Moses S Charikar. Similarity Estimation Techniques from Rounding Algorithms. In *STOC*, 2002. 17,  
886 20
- 887 [74] The FlowCAP Consortium, The DREAM Consortium, Nima Aghaeepour, Greg Finak, Holger Hoos,  
888 Tim R Mosmann, Ryan Brinkman, Raphael Gottardo, and Richard H Scheuermann. Critical assess-  
889 ment of automated flow cytometry data analysis techniques. *Nat Methods*, 10(3):228–238, March  
890 2013. ISSN 1548-7091, 1548-7105. doi: 10.1038/nmeth.2365. 18, 20
- 891 [75] Chris P. Verschoor, Alina Lelic, Jonathan L. Bramson, and Dawn M. E. Bowdish. An Introduction to  
892 Automated Flow Cytometry Gating Tools and Their Implementation. *Front. Immunol.*, 6, July 2015.  
893 ISSN 1664-3224. doi: 10.3389/fimmu.2015.00380.

- 894 [76] Florian Mair, Felix J. Hartmann, Dunja Mrdjen, Vinko Tosevski, Carsten Krieg, and Burkhard Becher.  
895 The end of gating? An introduction to automated analysis of high dimensional cytometry data: High-  
896 lights. *Eur. J. Immunol.*, 46(1):34–43, January 2016. ISSN 00142980. doi: 10.1002/eji.201545774.
- 897 [77] Andrea Cossarizza, Hyun-Dong Chang, Andreas Radbruch, Andreas Acs, Dieter Adam, Sabine Adam-  
898 Klages, William W. Agace, Nima Aghaeepour, Mübeccel Akdis, Matthieu Allez, Larissa Nogueira  
899 Almeida, Giorgia Alvisi, Graham Anderson, Immanuel Andrä, Francesco Annunziato, Achille  
900 Anselmo, Petra Bacher, Cosima T. Baldari, Sudipto Bari, Vincenzo Barnaba, Joana Barros-Martins,  
901 Luca Battistini, Wolfgang Bauer, Sabine Baumgart, Nicole Baumgarth, Dirk Baumjohann, Bianka  
902 Baying, Mary Bebawy, Burkhard Becher, Wolfgang Beisker, Vladimir Benes, Rudi Beyaert, Alfonso  
903 Blanco, Dominic A. Boardman, Christian Bogdan, Jessica G. Borger, Giovanna Borsellino, Philip E.  
904 Boulais, Jolene A. Bradford, Dirk Brenner, Ryan R. Brinkman, Anna E. S. Brooks, Dirk H. Busch,  
905 Martin Büscher, Timothy P. Bushnell, Federica Calzetti, Garth Cameron, Ilenia Cammarata, Xuetao  
906 Cao, Susanna L. Cardell, Stefano Casola, Marco A. Cassatella, Andrea Cavani, Antonio Celada, Lu-  
907 cienne Chatenoud, Pratip K. Chattopadhyay, Sue Chow, Eleni Christakou, Luka Čičin-Šain, Mario  
908 Clerici, Federico S. Colombo, Laura Cook, Anne Cooke, Andrea M. Cooper, Alexandra J. Corbett,  
909 Antonio Cosma, Lorenzo Cosmi, Pierre G. Coulie, Ana Cumano, Ljiljana Cvetkovic, Van Duc Dang,  
910 Chantip Dang-Heine, Martin S. Davey, Derek Davies, Sara De Biasi, Genny Del Zotto, Gelo Victori-  
911 ano Dela Cruz, Michael Delacher, Silvia Della Bella, Paolo Dellabona, Günnur Deniz, Mark Dessing,  
912 James P. Di Santo, Andreas Diefenbach, Francesco Dieli, Andreas Dolf, Thomas Dörner, Regine J.  
913 Dress, Diana Dudziak, Michael Dustin, Charles-Antoine Dutertre, Friederike Ebner, Sidonia B. G.  
914 Eckle, Matthias Edinger, Pascale Eede, Götz R.A. Ehrhardt, Marcus Eich, Pablo Engel, Britta En-  
915 gelhardt, Anna Erdei, Charlotte Esser, Bart Everts, Maximilien Evrard, Christine S. Falk, Todd A.  
916 Fehniger, Mar Felipe-Benavent, Helen Ferry, Markus Feuerer, Andrew Filby, Kata Filkor, Simon Fil-  
917 latreau, Marie Follo, Irmgard Förster, John Foster, Gemma A. Foulds, Britta Frehse, Paul S. Frenette,  
918 Stefan Frischbutter, Wolfgang Fritzsche, David W. Galbraith, Anastasia Gangaev, Natalio Garbi, Brice  
919 Gaudilliere, Ricardo T. Gazzinelli, Jens Geginat, Wilhelm Gerner, Nicholas A. Gherardin, Kamran  
920 Ghoreschi, Lara Gibellini, Florent Ginhoux, Keisuke Goda, Dale I. Godfrey, Christoph Goettlinger,  
921 Jose M. González-Navajas, Carl S. Goodyear, Andrea Gori, Jane L. Grogan, Daryl Grummitt, Andreas  
922 Grützkau, Claudia Haftmann, Jonas Hahn, Hamida Hammad, Günter Hämmerling, Leo Hansmann,  
923 Goran Hansson, Christopher M. Harpur, Susanne Hartmann, Andrea Hauser, Anja E. Hauser, David L.  
924 Haviland, David Hedley, Daniela C. Hernández, Guadalupe Herrera, Martin Herrmann, Christoph  
925 Hess, Thomas Höfer, Petra Hoffmann, Kristin Hogquist, Tristan Holland, Thomas Höllt, Rikard Holm-  
926 dahl, Pleun Hombrink, Jessica P. Houston, Bimba F. Hoyer, Bo Huang, Fang-Ping Huang, Johanna E.  
927 Huber, Jochen Huehn, Michael Hundemer, Christopher A. Hunter, William Y. K. Hwang, Anna Ian-  
928 none, Florian Ingelfinger, Sabine M Ivison, Hans-Martin Jäck, Peter K. Jani, Beatriz Jávega, Stipan  
929 Jonjic, Toralf Kaiser, Tomas Kalina, Thomas Kamradt, Stefan H. E. Kaufmann, Baerbel Keller, Steven  
930 L. C. Ketelaars, Ahad Khalilnezhad, Srijit Khan, Jan Kisielow, Paul Klenerman, Jasmin Knopf, Hui-  
931 Fern Koay, Katja Kobow, Jay K. Kolls, Wan Ting Kong, Manfred Kopf, Thomas Korn, Katharina  
932 Kriegsmann, Hendy Kristyanto, Thomas Kroneis, Andreas Krueger, Jenny Kühne, Christian Kukat,  
933 Désirée Kunkel, Heike Kunze-Schumacher, Tomohiro Kurosaki, Christian Kurts, Pia Kvistborg, Im-  
934manuel Kwok, Jonathan Landry, Olivier Lantz, Paola Lanuti, Francesca LaRosa, Agnès Lehuen, Sa-  
935 lomé LeibundGut-Landmann, Michael D. Leipold, Leslie Y.T. Leung, Megan K. Levings, Andreia C.  
936 Lino, Francesco Liotta, Virginia Litwin, Yanling Liu, Hans-Gustaf Ljunggren, Michael Lohoff, Gio-  
937vanna Lombardi, Lilly Lopez, Miguel López-Botet, Amy E. Lovett-Racke, Erik Lubberts, Herve  
938 Luche, Burkhard Ludewig, Enrico Lugli, Sebastian Lunemann, Holden T. Maecker, Laura Maggi,

939 Orla Maguire, Florian Mair, Kerstin H. Mair, Alberto Mantovani, Rudolf A. Manz, Aaron J. Mar-  
940 shall, Alicia Martínez-Romero, Glòria Martrus, Ivana Marventano, Włodzimierz Maslinski, Giuseppe  
941 Matarese, Anna Vittoria Mattioli, Christian Maueröder, Alessio Mazzoni, James McCluskey, Mairi  
942 McGrath, Helen M. McGuire, Iain B. McInnes, Henrik E. Mei, Fritz Melchers, Susanne Melzer, Dirk  
943 Mielenz, Stephen D. Miller, Kingston H.G. Mills, Hans Minderman, Jenny Mjösberg, Jonni Moore,  
944 Barry Moran, Lorenzo Moretta, Tim R. Mosmann, Susann Müller, Gabriele Multhoff, Luis Enrique  
945 Muñoz, Christian Münz, Toshinori Nakayama, Milena Nasi, Katrin Neumann, Lai Guan Ng, Anto-  
946 nia Niedobitek, Sussan Nourshargh, Gabriel Núñez, José-Enrique O’Connor, Aaron Ochel, Anna Oja,  
947 Diana Ordonez, Alberto Orfao, Eva Orlowski-Oliver, Wenjun Ouyang, Annette Oxenius, Raghaven-  
948 dra Palankar, Isabel Panse, Kovit Pattanapanyasat, Malte Paulsen, Dinko Pavlinic, Livius Penter, Pärt  
949 Peterson, Christian Peth, Jordi Petriz, Federica Piancone, Winfried F. Pickl, Silvia Piconese, Mar-  
950 cello Pinti, A. Graham Pockley, Malgorzata Justyna Podolska, Zhiyong Poon, Katharina Pracht, Immo  
951 Prinz, Carlo E. M. Pucillo, Sally A. Quataert, Linda Quatrini, Kylie M. Quinn, Helena Radbruch, Tim  
952 R. D. J. Radstake, Susann Rahmig, Hans-Peter Rahn, Bartek Rajwa, Gevitha Ravichandran, Yotam  
953 Raz, Jonathan A. Rebhahn, Diether Recktenwald, Dorothea Reimer, Caetano Reis e Sousa, Ester B.M.  
954 Remmerswaal, Lisa Richter, Laura G. Rico, Andy Riddell, Aja M. Rieger, J. Paul Robinson, Chiara  
955 Romagnani, Anna Rubartelli, Jürgen Ruland, Armin Saalmüller, Yvan Saeys, Takashi Saito, Shimon  
956 Sakaguchi, Francisco Sala-de Oyanguren, Yvonne Samstag, Sharon Sanderson, Inga Sandrock, Angela  
957 Santoni, Ramon Bellmàs Sanz, Marina Saresella, Catherine Sautes-Fridman, Birgit Sawitzki, Linda  
958 Schadt, Alexander Scheffold, Hans U. Scherer, Matthias Schiemann, Frank A. Schildberg, Esther  
959 Schimisky, Andreas Schlitzer, Josephine Schlosser, Stephan Schmid, Steffen Schmitt, Kilian Schober,  
960 Daniel Schraivogel, Wolfgang Schuh, Thomas Schüler, Reiner Schulte, Axel Ronald Schulz, Sebas-  
961 tian R. Schulz, Cristiano Scottá, Daniel Scott-Algara, David P. Sester, T. Vincent Shankey, Bruno Silva-  
962 Santos, Anna Katharina Simon, Katarzyna M. Sitnik, Silvano Sozzani, Daniel E. Speiser, Josef Spi-  
963 dlen, Anders Stahlberg, Alan M. Stall, Natalie Stanley, Regina Stark, Christina Stehle, Tobit Steinmetz,  
964 Hannes Stockinger, Yousuke Takahama, Kiyoshi Takeda, Leonard Tan, Attila Tárnok, Gisa Tiegs,  
965 Gergely Toldi, Julia Tornack, Elisabetta Traggiai, Mohamed Trebak, Timothy I.M. Tree, Joe Trot-  
966 ter, John Trowsdale, Maria Tsoumakidou, Henning Ulrich, Sophia Urbanczyk, Willem Veen, Maries  
967 Broek, Edwin Pol, Sofie Van Gassen, Gert Van Isterdael, René A.W. Lier, Marc Veldhoen, Salvador  
968 Vento-Asturias, Paulo Vieira, David Voehringer, Hans-Dieter Volk, Anouk Borstel, Konrad Volkmann,  
969 Ari Waisman, Rachael V. Walker, Paul K. Wallace, Sa A. Wang, Xin M. Wang, Michael D. Ward,  
970 Kirsten A Ward-Hartstonge, Klaus Warnatz, Gary Warnes, Sarah Warth, Claudia Waskow, James V.  
971 Watson, Carsten Watzl, Leonie Wegener, Thomas Weisenburger, Annika Wiedemann, Jürgen Wien-  
972 ands, Anneke Wilharm, Robert John Wilkinson, Gerald Willimsky, James B. Wing, Rieke Winkel-  
973 mann, Thomas H. Winkler, Oliver F. Wirz, Alicia Wong, Peter Wurst, Jennie H. M. Yang, Juhao Yang,  
974 Maria Yazdanbakhsh, Liping Yu, Alice Yue, Hanlin Zhang, Yi Zhao, Susanne Maria Ziegler, Christina  
975 Zielinski, Jakob Zimmermann, and Arturo Zychlinsky. Guidelines for the use of flow cytometry and  
976 cell sorting in immunological studies (second edition). *Eur. J. Immunol.*, 49(10):1457–1973, October  
977 2019. ISSN 0014-2980, 1521-4141. doi: 10.1002/eji.201970107. 20

978 [78] Steven N. Evans and Frederick A. Matsen. The phylogenetic Kantorovich-Rubinstein metric for envi-  
979 ronmental sequence samples. *J R Stat Soc Series B Stat Methodol.*, 2012. 21

980 [79] Ulrike von Luxburg. A tutorial on spectral clustering. *Stat Comput*, 17(4):395–416, December 2007.  
981 ISSN 0960-3174, 1573-1375. doi: 10.1007/s11222-007-9033-z. 22

982 [80] Fabian Pedregosa, Gael Varoquaux, Alexandre Gramfort, Vincent Michel, Bertrand Thirion, Olivier



- 983           Grisel, Mathieu Blondel, Peter Prettenhofer, Ron Weiss, Vincent Dubourg, Jake Vanderplas, Alexandre  
984           Passos, and David Cournapeau. Scikit-learn: Machine Learning in Python. *MACHINE LEARNING IN*  
985           *PYTHON*, 2011. 22
- 986 [81] M. H. Spitzer, P. F. Gherardini, G. K. Fragiadakis, N. Bhattacharya, R. T. Yuan, A. N. Hotson, R. Finck,  
987           Y. Carmi, E. R. Zunder, W. J. Fantl, S. C. Bendall, E. G. Engleman, and G. P. Nolan. Immunology.  
988           an interactive reference framework for modeling a dynamic immune system. *Science*, 349(6244):  
989           1259425, 2015. 39

**Table S1:** PDO mutations and clinical metadata.

| <b>Patient</b> | <b>Mutations</b> | <b>Mutated Genes</b>                                                                                                                                                                                                                                                                                                  | <b>MSI</b> | <b>Stage</b> | <b>Location</b>  | <b>Cell Model Passport</b> |
|----------------|------------------|-----------------------------------------------------------------------------------------------------------------------------------------------------------------------------------------------------------------------------------------------------------------------------------------------------------------------|------------|--------------|------------------|----------------------------|
| PDO 05         | 30               | <i>APC, KRAS, PIK3CA, B2M, TCF7L2, PDGFRA</i>                                                                                                                                                                                                                                                                         | No         | III          | Rectum           | HCM-SANG-0266-C20          |
| PDO 11         | 41               | <i>APC, KRAS</i>                                                                                                                                                                                                                                                                                                      | No         | I            | Transverse colon | HCM-SANG-0267-D12          |
| PDO 21         | 49               | <i>KRAS, SMAD4, ARID1A, PIK3RI, CTNNB1, NOTCH2</i>                                                                                                                                                                                                                                                                    | No         | II           | Rectum           | HCM-SANG-0270-C20          |
| PDO 23         | 40               | <i>APC, TP53, SUFU</i>                                                                                                                                                                                                                                                                                                | No         | I            | Sigmoid colon    | HCM-SANG-0271-D12          |
| PDO 75         | 27               | <i>APC, TP53, PTEN, PIK3RI, ALK, ZNF292</i>                                                                                                                                                                                                                                                                           | No         | I            | Rectum           | HCM-SANG-0278-C20          |
| PDO 109        | 38               | <i>APC, KRAS, SOX9, TP53</i>                                                                                                                                                                                                                                                                                          | No         | III          | Sigmoid colon    | HCM-SANG-0529-C18          |
| PDO 141        | 20               | <i>APC, KRAS, PIK3CA, TP53</i>                                                                                                                                                                                                                                                                                        | No         | III          | Sigmoid colon    | HCM-SANG-0284-C18          |
| PDO 27         | 397              | <i>APC, TP53, B2M, RNF43, ACVR2A, KMT2C, EP300, CEBBP, CCND1, FANCE, FAS, GRIN2A, HDLBP, HNF1A, MSH3, PI3KCB, POLE, SYNE1, TP53BP1, USP9X, ZNF292</i>                                                                                                                                                                 | Yes        | III          | Ascending colon  | HCM-SANG-0273-C18          |
| PDO 99         | 393              | <i>PIK3CA, SOX9, BRAF, BMPR2, RNF43, MLH1, ACVR2A, AXIN1, CASP8, FAT1, KMT2C, TAG2, TBX3, GPS2, SPEN, AXIN2, BCL9L, FANCA, MSH3, TRAF7, UBR5, ZNF292</i>                                                                                                                                                              | Yes        | II           | Ascending colon  | HCM-SANG-0282-C18          |
| PDO 216        | 352              | <i>TP53, PIK3CA, FBXW7, BRAF, ARID1A, ACVR2A, B2M, BMPR2, CD58, RNF43, ZNRF3, KMT2B, KMT2D, PBRM1, BRCA2, NCOR1, KDM6A, GATA3, ASXL1, PTCH1, RASA1, CASP8, TGFB2, RBM10, BRD7, RPL22, CDKN1B, PPM1D, CUX1, CLIL, DROSHA, FAS, FAT3, FLT4, HNF1A, HNRNPA2B1, HSPG2, LRIG3, MSH6, NAB2, PIM1, QKI, SH2B3, SUFU, XPA</i> | Yes        | III          | Transverse colon | HCM-SANG-0520-C18          |

**Table S2:** Drug treatment key for PDO-CAF TOBis mass cytometry master dataframe (Ramos, Maria (2022), “Ramos Zapatero et. al (Cancer-Associated Fibroblasts Regulate Patient-Derived Organoid Drug Responses)”, Mendeley Data, V1, doi: 10.17632/hc8gxwks3p.1).

| Treatment                         | Label            | Conc. Label | Conc. (1)   | Conc. (2) | Conc. (3) |
|-----------------------------------|------------------|-------------|-------------|-----------|-----------|
| SN-38                             | S                | 1           | 1 nM        | —         | —         |
|                                   | S                | 2           | 10 nM       | —         | —         |
|                                   | S                | 3           | 50 nM       | —         | —         |
|                                   | S                | 4           | 100 nM      | —         | —         |
| 5-FU                              | F                | 1           | 200 nM      | —         | —         |
|                                   | F                | 2           | 2 $\mu$ M   | —         | —         |
|                                   | F                | 3           | 20 $\mu$ M  | —         | —         |
|                                   | F                | 4           | 200 $\mu$ M | —         | —         |
| Oxaliplatin                       | O                | 1           | 2 nM        | —         | —         |
|                                   | O                | 2           | 20 nM       | —         | —         |
|                                   | O                | 3           | 200 nM      | —         | —         |
| LGK-974                           | L                | 1           | 1 nM        | —         | —         |
|                                   | L                | 2           | 10 nM       | —         | —         |
|                                   | L                | 3           | 50 nM       | —         | —         |
|                                   | L                | 4           | 5000 nM     | —         | —         |
| SN-38 (1) + VX-970 (2)            | V                | 1           | —           | 250 nM    | —         |
|                                   | VS               | 2           | 1 nM        | 250 nM    | —         |
|                                   | VS               | 3           | 10 nM       | 250 nM    | —         |
|                                   | VS               | 4           | 100 nM      | 250 nM    | —         |
| SN-38 (1) + 5-FU (2) + Cetux. (3) | C                | 1           | —           | —         | 5 nM      |
|                                   | CS               | 2           | 10 nM       | —         | 5 nM      |
|                                   | CF               | 3           | —           | 2 $\mu$ M | 5 nM      |
|                                   | SF               | 4           | 10 nM       | 2 $\mu$ M | —         |
|                                   | CSF              | 5           | 10 nM       | 2 $\mu$ M | 5 nM      |
| DMSO                              | DMSO             | 0           | —           | —         | —         |
| NH <sub>4</sub> OH                | AH               | 0           | —           | —         | —         |
| H <sub>2</sub> O                  | H <sub>2</sub> O | 0           | —           | —         | —         |

**Table S3:** Mass cytometry antibody panel used in all TOBis PDO-CAF experiments.

| <b>Extracellular Antigen</b>                    | <b>Metal</b>      | <b>Clone</b>    | <b>Supplier</b>       |
|-------------------------------------------------|-------------------|-----------------|-----------------------|
| CD326 (EpCAM)                                   | <sup>113</sup> In | 9C4             | BioLegend             |
| CHGA                                            | <sup>170</sup> Er | C-12            | Insight Biotechnology |
| CD90 (THY1)                                     | <sup>173</sup> Yb | 5E10            | CST                   |
| <b>Intracellular Antigen</b>                    | <b>Metal</b>      | <b>Clone</b>    | <b>Supplier</b>       |
| pHistone H3 [S28]                               | <sup>89</sup> Y   | HTA28           | BioLegend             |
| RFP                                             | <sup>106</sup> Cd | 8E5.G7          | eBiosciences          |
| mCherry                                         | <sup>110</sup> Cd | 16D7            | ThermoFisher          |
| Vimentin                                        | <sup>111</sup> Cd | RV202           | BD Biosciences        |
| CK18                                            | <sup>114</sup> Cd | C-04            | Abcam                 |
| Pan-CK                                          | <sup>115</sup> In | AE1/AE3         | Biologend UK          |
| GFP                                             | <sup>116</sup> Cd | 5F12.4          | eBiosciences          |
| pPDK1 [S241]                                    | <sup>141</sup> Pr | J66-653.44.22   | BD Biosciences        |
| cCaspase 3 [D175]                               | <sup>142</sup> Nd | D3E9            | CST                   |
| Geminin                                         | <sup>143</sup> Nd | Polyclonal      | Santa Cruz            |
| pMEK 1/2 [S221]                                 | <sup>144</sup> Nd | 166F8           | CST                   |
| pNDRG1 [T346]                                   | <sup>145</sup> Nd | D98G11          | CST                   |
| pMKK4 SEK1 [S257]                               | <sup>146</sup> Nd | C36C11          | CST                   |
| pBTK [Y511]                                     | <sup>147</sup> Sm | 24a/BTK         | BD Biosciences        |
| pSRC [Y418]                                     | <sup>148</sup> Nd | SC1T2M3         | BD Biosciences        |
| p4E-BP1 [T37/46]                                | <sup>149</sup> Sm | 236B4           | CST                   |
| pRB [S807/811]                                  | <sup>150</sup> Nd | J1112-906       | BD Biosciences        |
| pPKC $\alpha$ [T497]                            | <sup>151</sup> Eu | K14-984         | BD Biosciences        |
| pAKT [T308]                                     | <sup>152</sup> Sm | J1-223.371      | BD Biosciences        |
| pCREB [S133]                                    | <sup>153</sup> Eu | 87G3            | CST                   |
| pSMAD1/5/9 [S463/465] / [S463/465] / [S465/467] | <sup>154</sup> Sm | D5B10           | CST                   |
| pAKT [S473]                                     | <sup>155</sup> Gd | D9E             | CST                   |
| pNK- $\kappa$ B p65 [S529]                      | <sup>156</sup> Gd | K10-895.12.50   | BD Biosciences        |
| pMKK3/pMKK6 [S189/207]                          | <sup>157</sup> Gd | D8E9            | CST                   |
| pP38 [T180/Y182]                                | <sup>158</sup> Gd | D3F9            | CST                   |
| pMAPKAPK2 [T334]                                | <sup>159</sup> Tb | 27B7            | Abcam                 |
| pAMPK $\alpha$ [T172]                           | <sup>160</sup> Gd | 40H9            | CST                   |
| pBAD [S112]                                     | <sup>161</sup> Dy | 40A9            | CST                   |
| pHistone H2A.X [S139]                           | <sup>162</sup> Dy | D7T2V           | CST                   |
| pP90RSK [T359]                                  | <sup>163</sup> Dy | D1E9            | CST                   |
| p120 Catenin [T310]                             | <sup>164</sup> Dy | 22/p120 (pT310) | BD Biosciences        |
| $\beta$ -Catenin [Active]                       | <sup>165</sup> Ho | D13A1           | CST                   |
| pGSK-3 $\beta$ [S9]                             | <sup>166</sup> Er | D85E12          | CST                   |
| pERK1/2 [T202/Y204]                             | <sup>167</sup> Er | 20A             | BD Biosciences        |
| pSMAD2/3 [S465/467] / [S423/425]                | <sup>168</sup> Er | D27F4           | CST                   |
| PLK1                                            | <sup>169</sup> Tm | 35-206          | ThermoFisher          |
| pDNAPK [S2056]                                  | <sup>171</sup> Yb | EPR5670         | Abcam                 |
| pS6 [S235/236]                                  | <sup>172</sup> Yb | D57.2.2E        | CST                   |
| cPARP [D214]                                    | <sup>174</sup> Yb | D64E10          | CST                   |
| pCHK1 [S345]                                    | <sup>175</sup> Lu | 133D3           | CST                   |
| Cyclin B1                                       | <sup>176</sup> Yb | GNS-11          | BD Biosciences        |

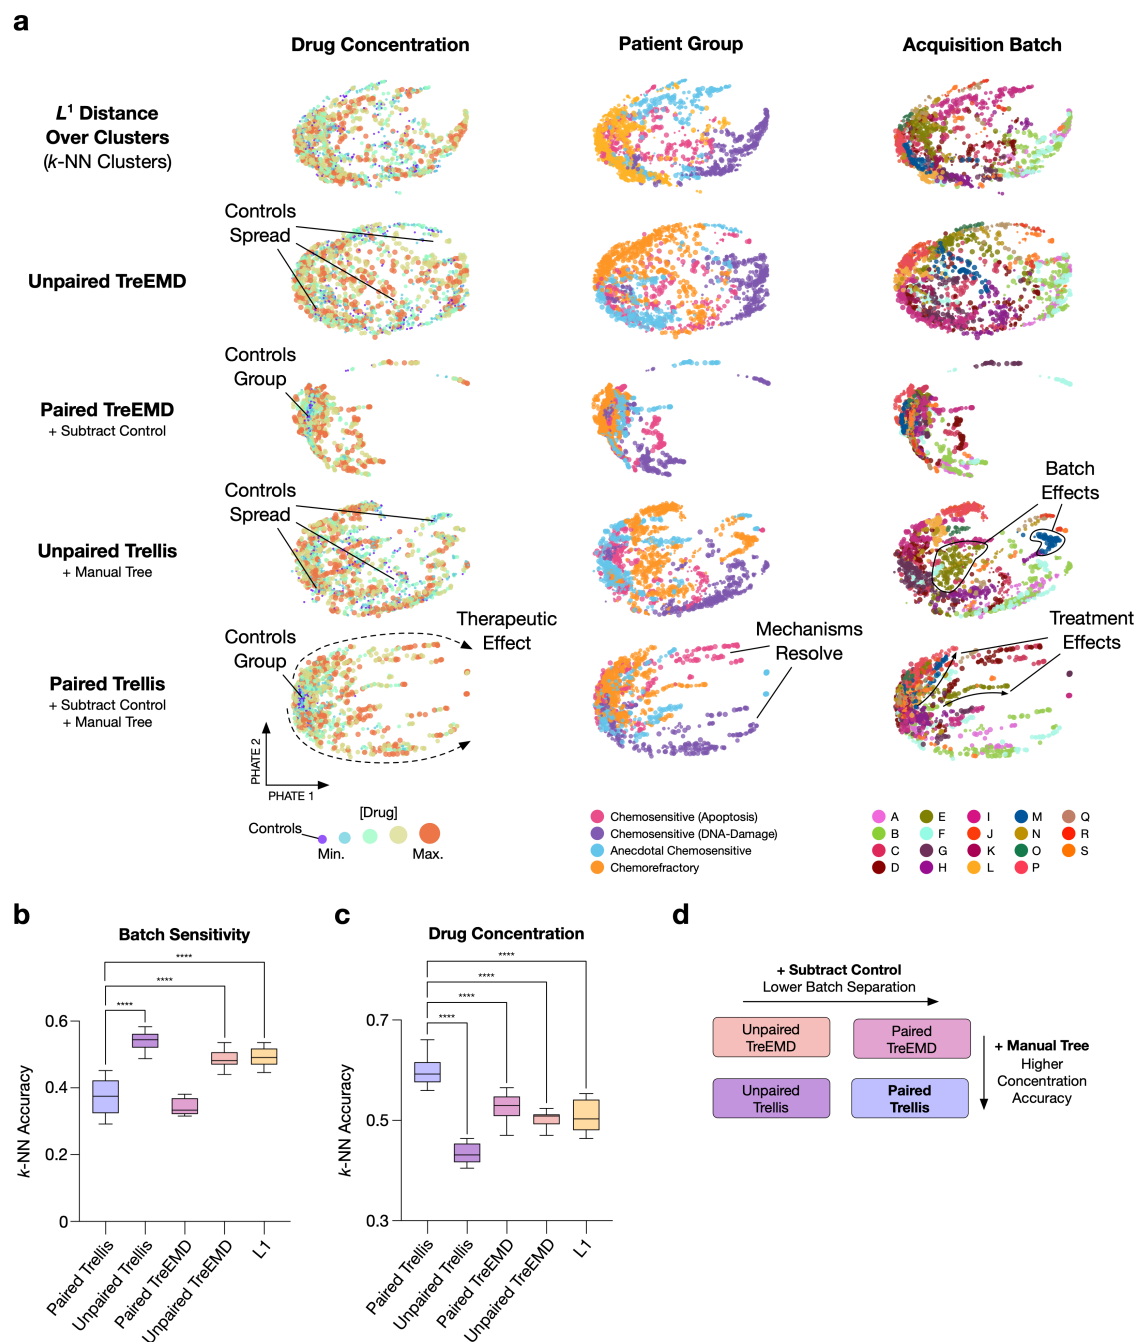

**Figure S1: Trellis Ablation Test.** **a)** Comparison of Trellis' ablated algorithm into:  $L^1$  distance over  $k$ -NN clusters, Wassertein distance over automatic gating (Unpaired TreEMD), Kantorovich-Rubenstein (KR) norm over automatic gating (Paired TreEMD), Wassertein distance over hierarchical tree partitions of the data by cell-state (Unpaired Trellis), and KR norm hierarchical tree partitions of the data by cell-state (Paired Trellis). **b)**  $k$ -NN accuracy score on acquisition batches. A higher  $k$ -NN accuracy infers a higher batch separation effect by the method. **c)**  $k$ -NN accuracy score on drug concentrations vs controls. Paired Trellis improves drug treatment effect detection. **d)** Schematic representation of the comparison across methods. One-way ANOVA, \*\*\*\* =  $<0.0001$  ( $n=10$ ).

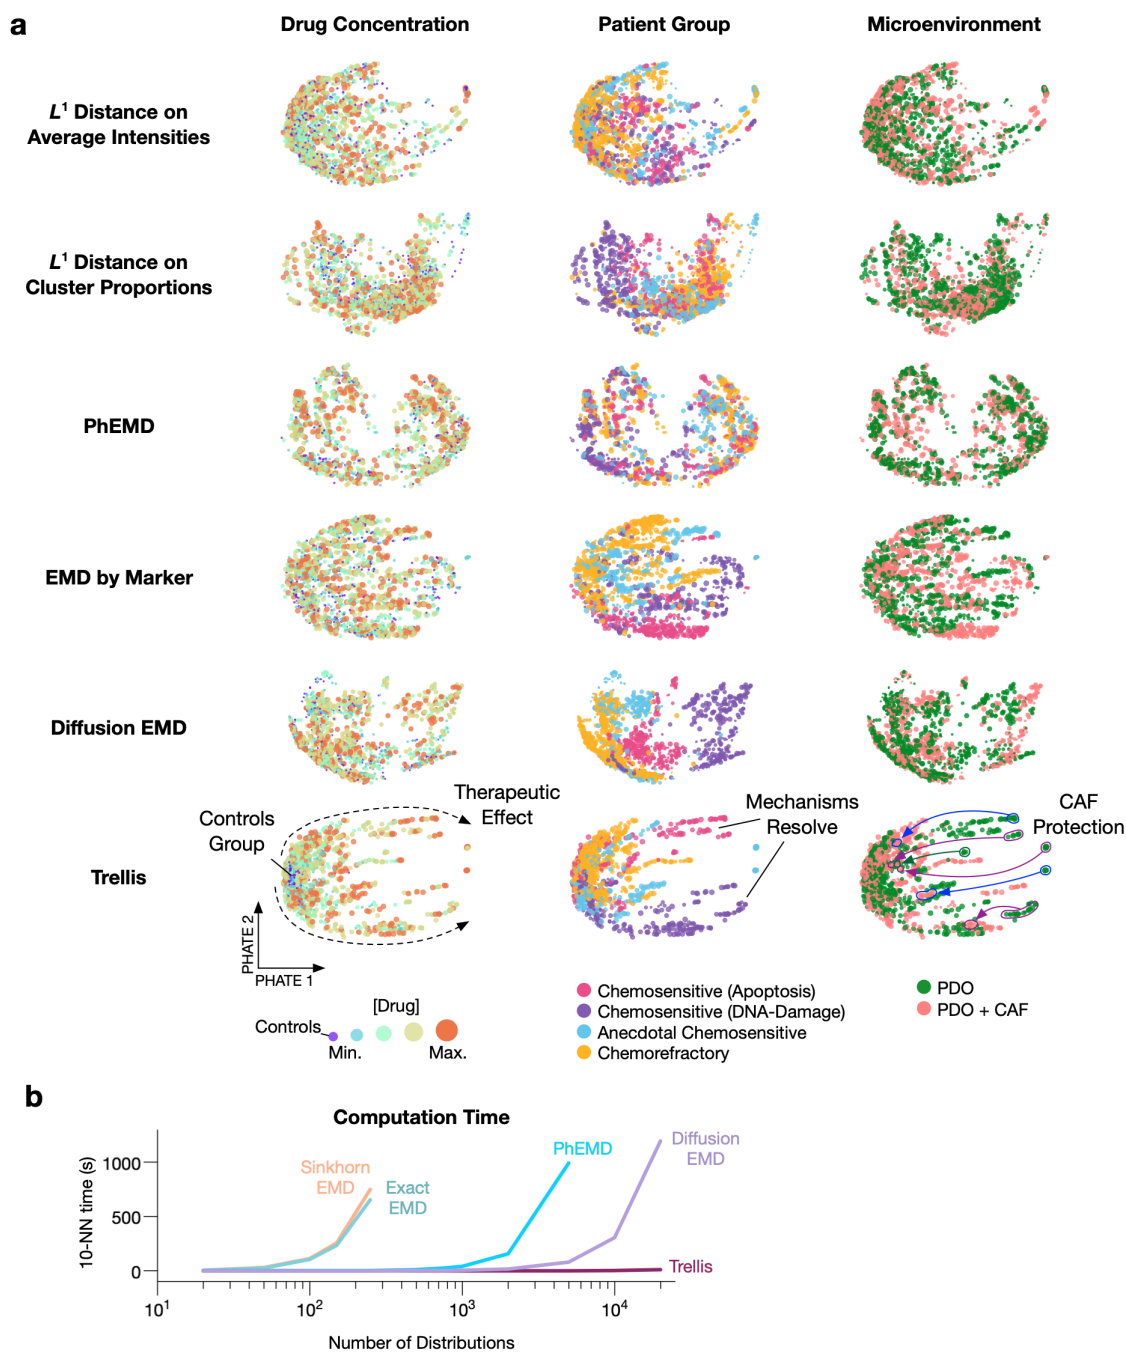

**Figure S2: Comparison of Trellis to Alternative Methods.** **a)** Trellis performance compared to existing methods such as  $L^1$  distance of average intensity of the markers,  $L^1$  distance of differential abundance of cells in clusters, PhEMD, EMDs between samples on marker intensities, and Diffusion EMD. Alternative methods fail to capture therapeutic effects and cannot identify CAF protection. **b)** Trellis speed and scalability relative to alternative EMD methods.



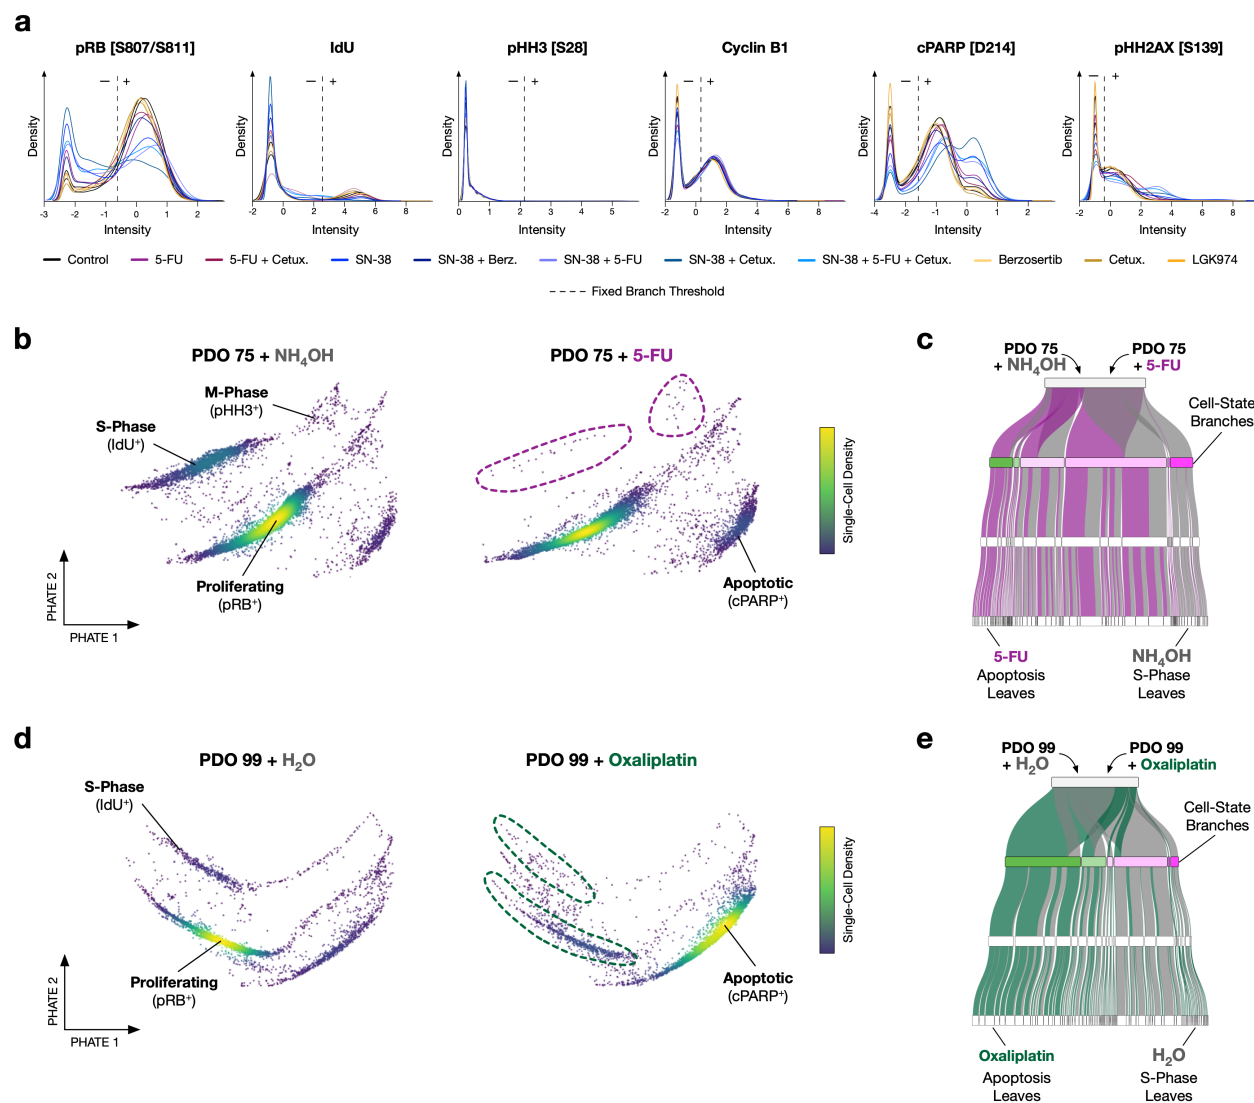

**Figure S4: Trellis Detection of PDO Cell-State Drug Responses.** **a**) Trellis cell-state branch thresholds for PDO 21 (batch-mean centered and arcsinh transformed intensities). **b**) Single-cell density PHATEs of PDO 75 treated with NH<sub>4</sub>OH vehicle control or 5-FU. **c**) Sankey diagram showing data from **b**) distributing through the cell-state Trellis layout in Fig. 2 (terminal leaves not shown). **d**) PDO 99 treated with H<sub>2</sub>O vehicle control or Oxaliplatin. **e**) Sankey diagram showing data from **d**) distributing through the cell-state Trellis layout in Fig. 2 (terminal leaves not shown).



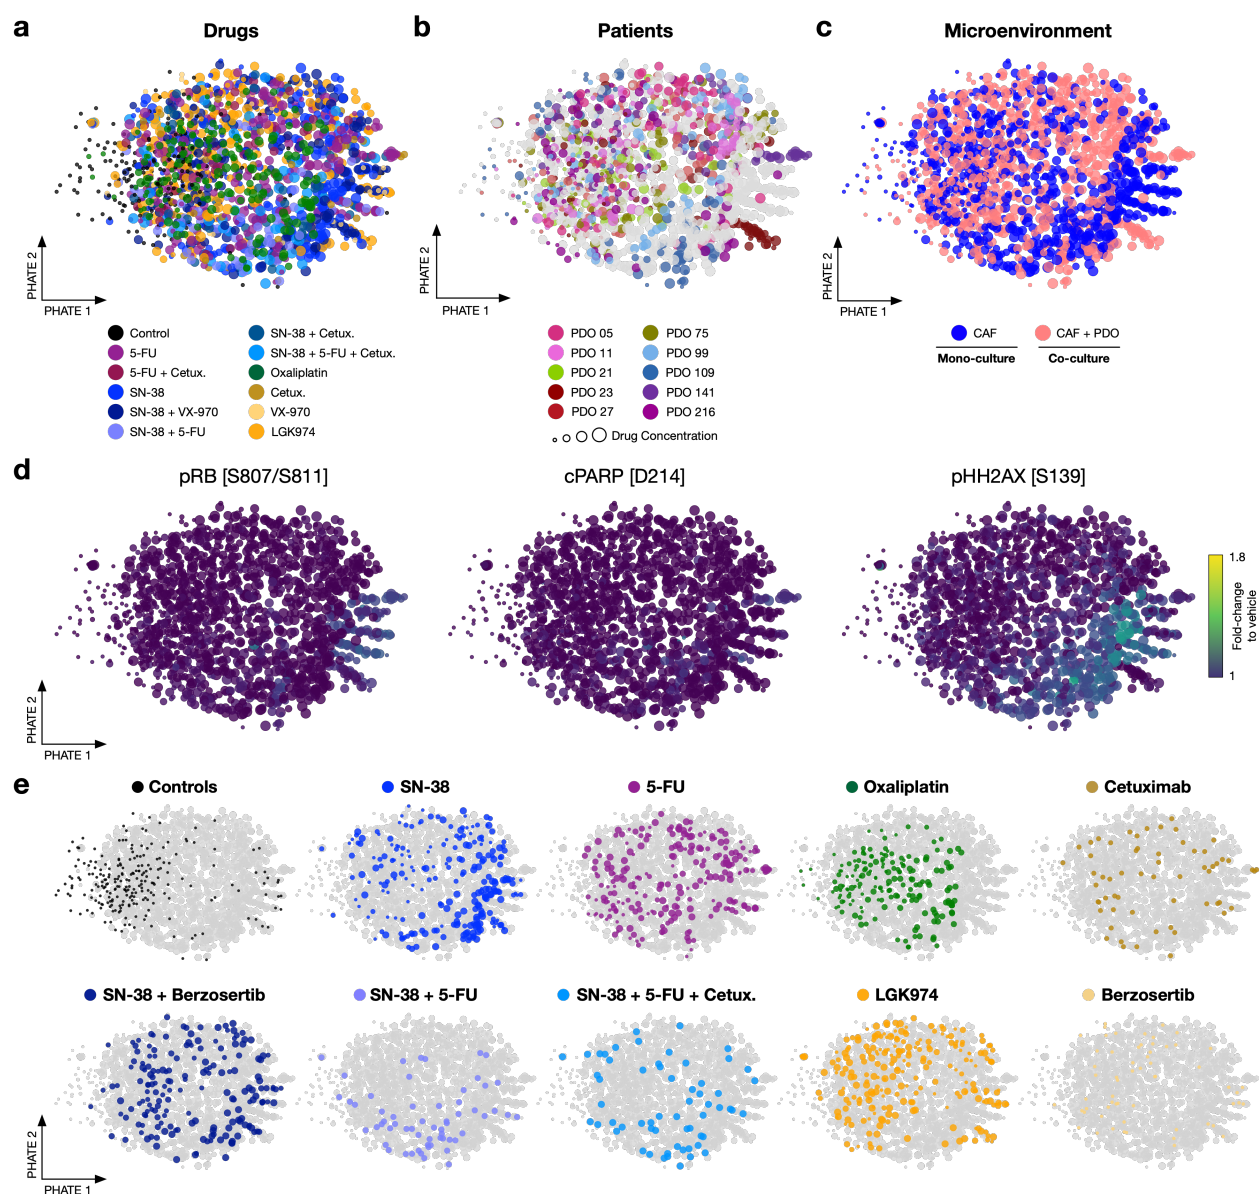

**Figure S5: Single-Cell PTM CAF Drug Responses.** **a)** Trellis-PHATE of PTM profiles from PDO-CAF cultures fails to identify drug-specific CAF responses, **b)** patient-specific CAF drug responses, or **c)** microenvironment-specific CAF drug responses. **d)** Fold-change to vehicle of pRB [S807/S811], cPARP [D214], and pHH2AX [S139] fail to resolve drug- or patient-specific shifts in cell-state. **e)** CAF responses to individual drug treatments.

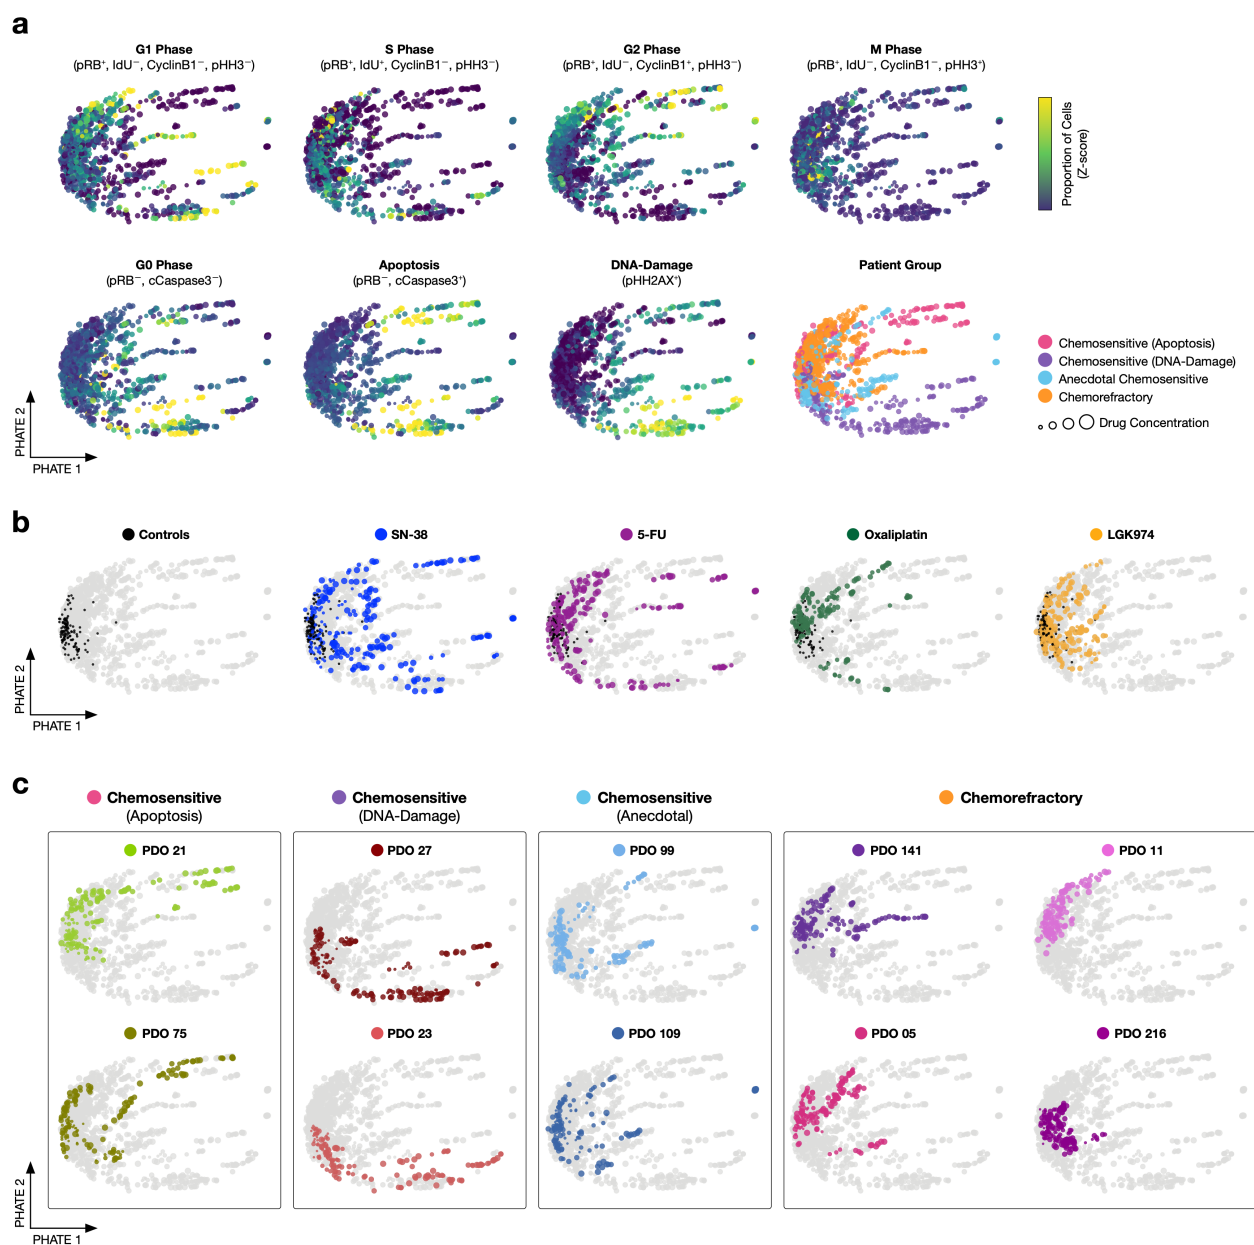

**Figure S6: PDO Trellis-PHATE Cell-State Distributions.** a) Treatment cell-state (z-score) across 1,680 single-cell PDO cultures reveal mechanistic drug treatment effects. b) Control, SN-38, 5-FU, Oxaliplatin, and LGK974 distributions. c) Individual patient distributions.

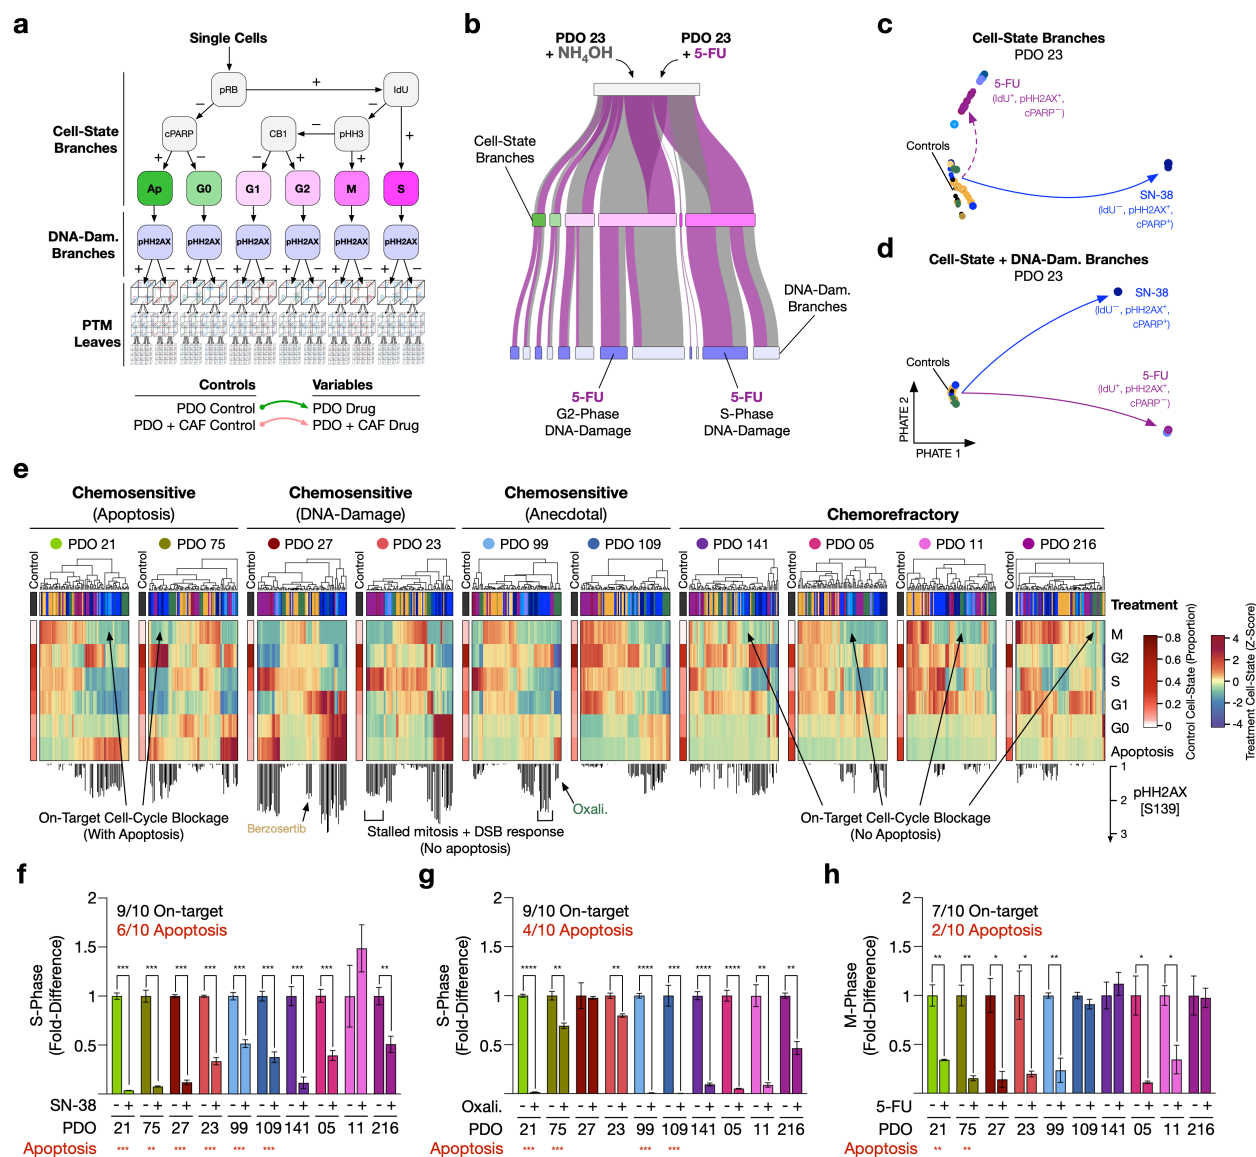

**Figure S7: Patient-Specific Regulation of Cell-State and DNA-Damage.** **a)** Trellis hierarchy containing cell-state branches with a pHH2AX [S139] DNA double-strand break detection layer. **b)** Sankey diagram showing  $\text{NH}_4\text{OH}$  vehicle control and 5-FU treatment of PDO 23 distributing through the cell-state Trellis branches in **a)** (leaves not shown). **c)** Trellis-PHATE of PDO 23 treatments analyzed using cell-state branches alone or **d)** cell-state branches and pHH2AX [S139] detection layer. The DNA-damage detection layer improves resolution of 5-FU on-target treatment effect. Solid arrows refer to strong treatment effect, dashed arrows refer to partial treatment effect. **e)** Patient-specific distribution of cells within Trellis branches reveals mechanistic cell-state shifts and DNA-damage upon drug treatments. Treatment cell-state quantifies the fold change of the proportion of cells/cell state over the controls for each treatment (Z-score). DNA damage is quantified by the fold change of the proportion pHH2AX<sup>+</sup> cells over the controls for each treatment. **f)** PDO cells in S-phase following 100 nM SN-38. **g)** PDO cells in S-phase following 200 nM Oxaliplatin. **h)** PDO cells in M-phase following 200 nM 5-FU. PDOs with a significant >1.5 fold increase in apoptosis are indicated in red. Unpaired *t*-test, \*\*\* <0.0001, \*\* <0.001, \* <0.01.

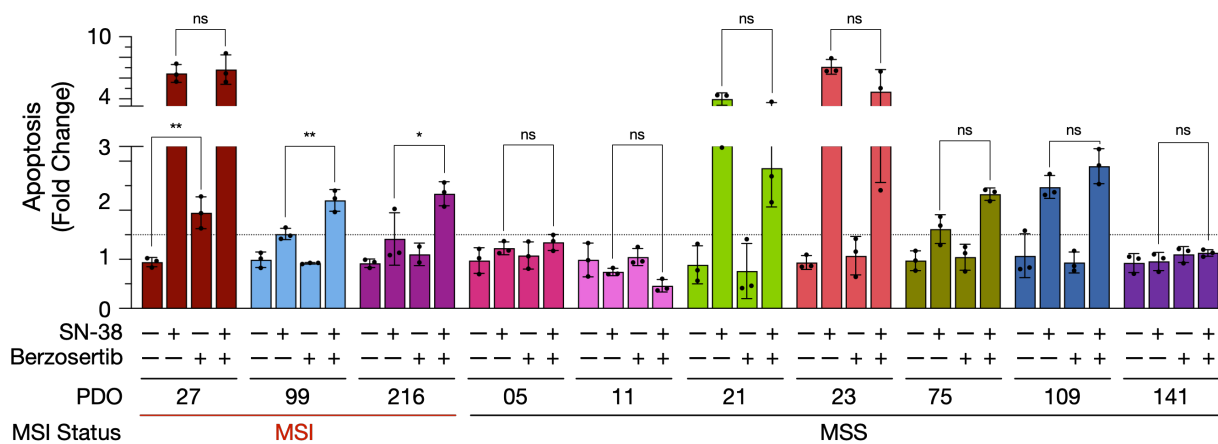

**Figure S8: ATR Inhibitor Sensitivity.** PDO apoptosis following treatment with SN-38 and/or Berzosertib. Only MSI PDOs are sensitive to ATR inhibitors either alone (PDO 27) or in combination with SN-38 (PDOs 99 and 216). Unpaired *t*-test, \*\*\* <0.0001, \*\* <0.001, \* <0.01.

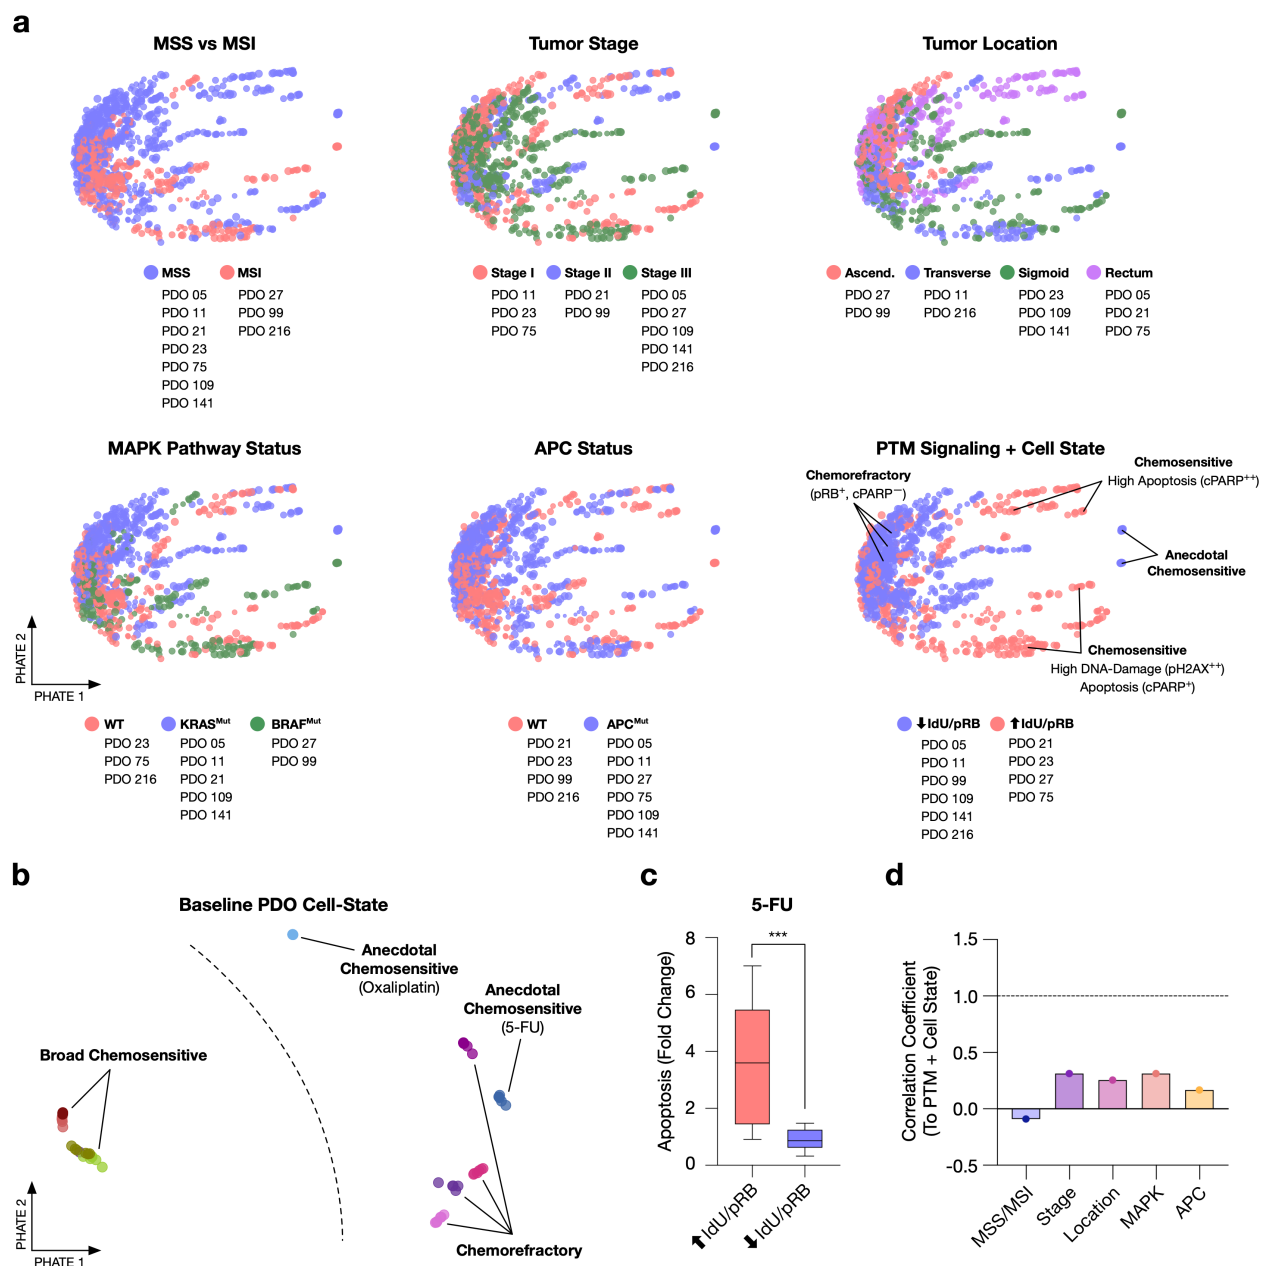

**Figure S9: PDO Metadata.** **a)** Trellis-PHATE plots of patient metadata. Patient-specific treatment effects do not align with MSS/MSI, tumor stage, tumor location, MAPK pathway mutations, or APC mutations. High baseline cell-cycle activity correlates with broad chemosensitivity. **b)** Trellis-PHATE of baseline PDOs annotated by chemosensitivity. **c)** Quantification of 5-FU chemocytotoxicity in low and high cycling PDOs. **d)** Quantification of the correlation between PDO metadata information and PDO cell-state. Unpaired *t*-test, \*\*\* <0.0001.

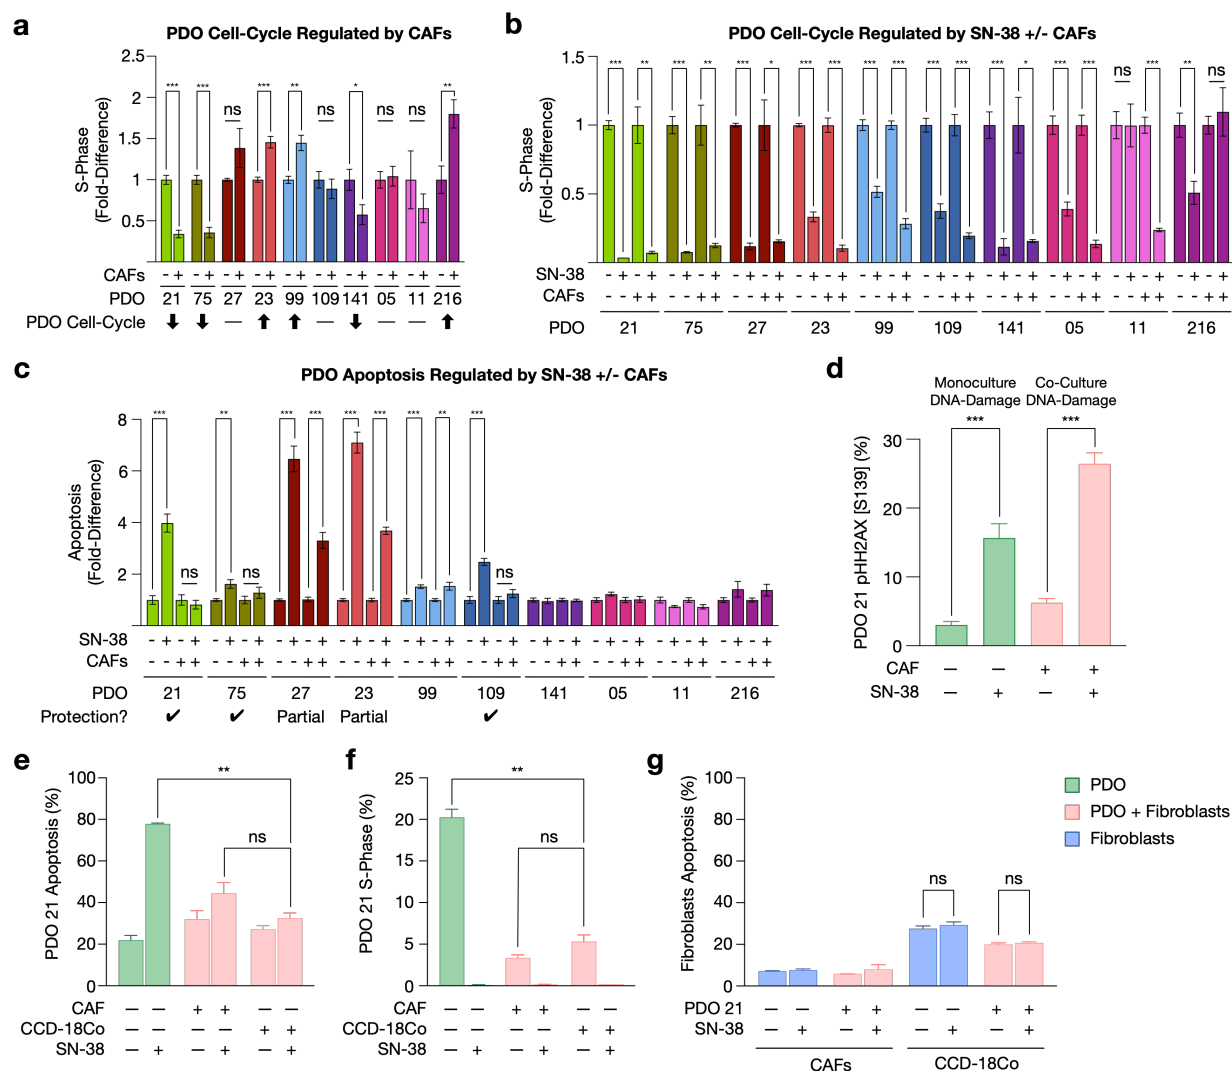

**Figure S10: CAF-Induced PDO Cell-State Shifts.** **a)** Fold-difference to monoculture of PDO cells in S-phase when co-cultured with CAFs. CAFs both decrease and increase PDO S-phase in a patient-specific manner. **b)** Fold-difference to vehicle controls of PDO cells in S-phase when treated with SN-38 either as PDOs alone or in co-culture with CAFs. CAFs do not alter SN-38 on-target S-phase blockage. **c)** PDO SN-38 induced apoptosis +/- CAFs. Partial CAF-protection is defined as a reduction drug-induced apoptosis in co-culture relative to monoculture, yet still apoptosis is still >1.5-fold over control and statistically significant. **d)** SN-38 induces on-target DNA-double strand breaks (DSB) (pHH2AX<sup>+</sup>) in PDO 21 irrespective of CAFs. **e-g)** PDO 21 chemoprotection via CCD-18Co normal colon fibroblasts. Unpaired *t*-test, \*\*\* <0.0001, \*\* <0.001, \* <0.01. ns, not significant.

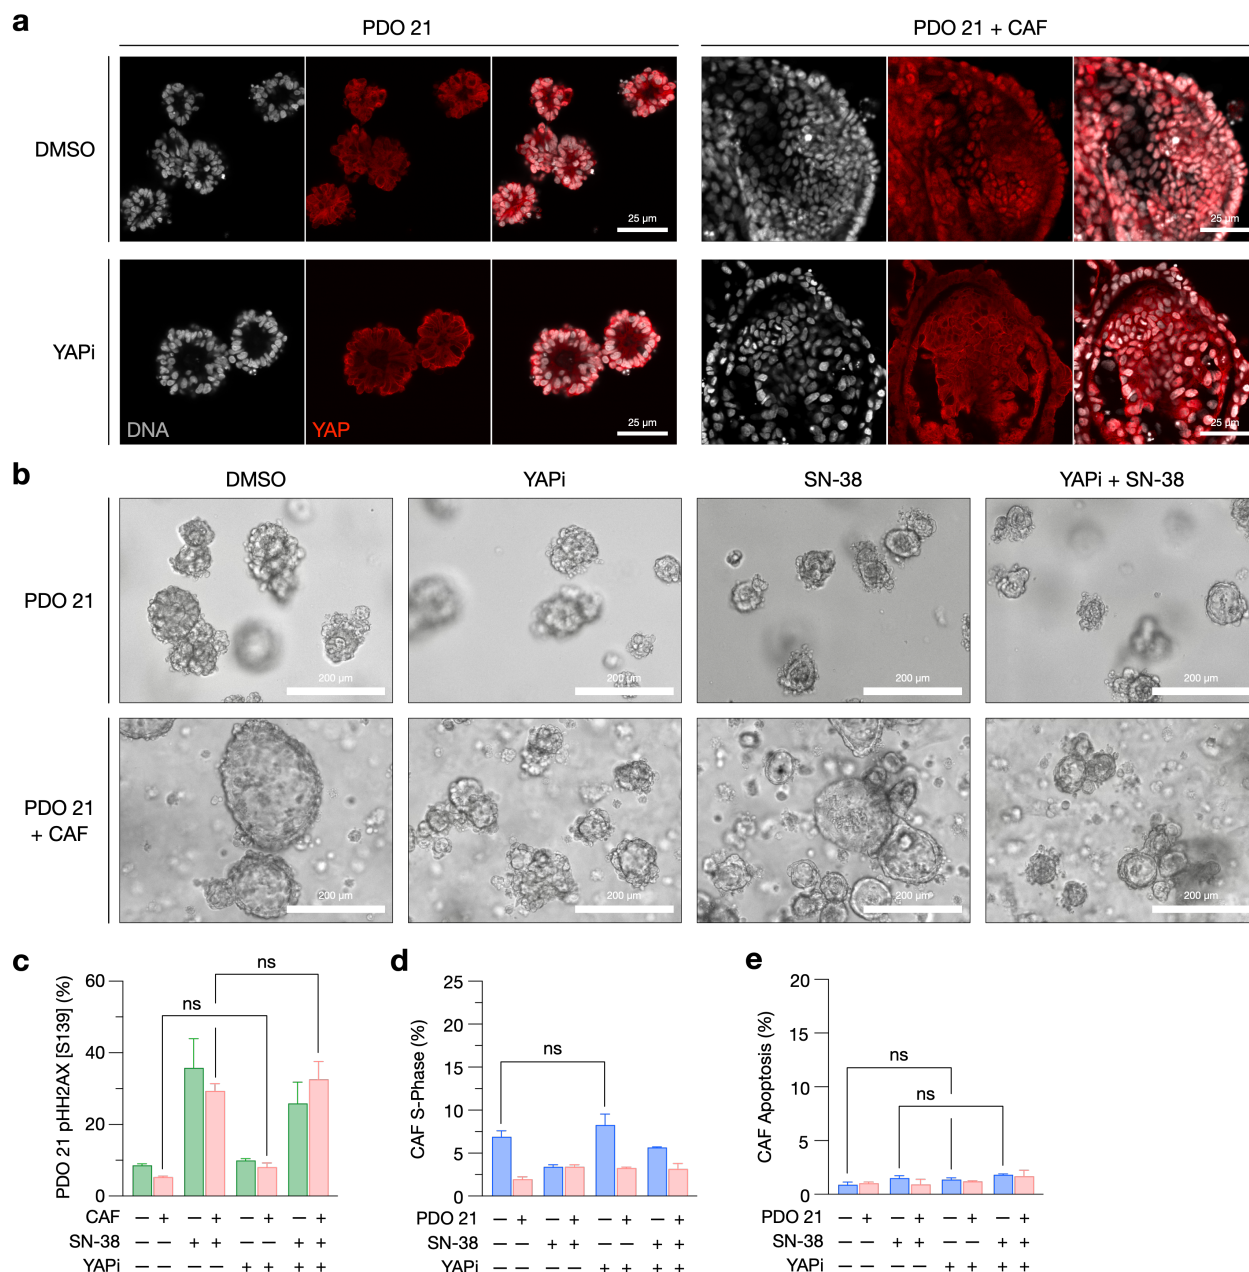

Source: https://www.biorxiv.org/content/10.1101/2022.10.19.512668.full.pdf
